# Supplementary material
Source: publisher site journal article supplement (https://www.dovepress.com/article/549772)
Supplement: Supplementary file 1 [file 549772%20Supplementary%20materials.docx]

**Table S1. ICD-9/10 codes used to define the outcomes in empirical study examples**

| **Outcome** | **Codes** |
| --- | --- |
| Pneumonia | Inpatient or outpatient ICD-9 code (any position) 480.xx–486.xx |
| Major bleeding | Inpatient ICD-9 code (any position):  430.x, 431.x  531.0x, 531.2x, 531.4x, 531.6x, 532.0x, 532.2x,  532.4x, 532.6x, 533.0x, 533.2x, 533.4x, 533.6x,  534.0x, 534.2x, 534.4x, 534.6x, 578.0  OR  ICD-9 procedure code 44.43  OR  CPT procedure code 43255 |

Abbreviations: CPT = Current Procedural Terminology; ICD = International Classification of Disease

**Table S2. Patients’ characteristics and absolute standardized mean difference before and after propensity score decile adjustment, MA system**

|  | **PPI vs. H2RA and pneumonia** | | | | **PPI vs. non-PPI and pneumonia** | | | | **Warfarin vs. DOAC and bleeding** | | | | **OAC vs. non-OAC and bleeding** | | | | |
| --- | --- | --- | --- | --- | --- | --- | --- | --- | --- | --- | --- | --- | --- | --- | --- | --- | --- |
| Variable | PPI | H2RA | ASMDc | ASMDw | PPI | Non-PPI | ASMDc | ASMDw | Warfarin | DOAC | ASMDc | ASMDw | OAC | Non-OAC | ASMDc | | ASMDw |
| Total | 51099 | 14447 |  |  | 51099 | 51330 |  |  | 10590 | 1562 |  |  | 12152 | 44252 |  |  | |
| Age in years, mean (SD) | 76 (7.4) | 75.6 (7.3) | 5.4 | 0.4 | 76 (7.4) | 75.4 (7.1) | 8.1 | 0.7 | 78.4 (7.3) | 76.3 (6.8) | 30.1 | 1.8 | 78.2 (7.3) | 78.5 (8) | 4.9 | 2.3 | |
| Age groups |  |  |  |  |  |  |  |  |  |  |  |  |  |  |  |  | |
| 65-74 | 24919 (48.8) | 7387 (51.1) | 4.7 | 0 | 24919 (48.8) | 7387 (51.1) | 4.7 | 0 | 24919 (48.8) | 7387 (51.1) | 4.7 | 0 | 24919 (48.8) | 7387 (51.1) | 4.7 | 0 | |
| 75-84 | 18446 (36.1) | 5066 (35.1) | 2.2 | 0 | 18446 (36.1) | 5066 (35.1) | 2.2 | 0 | 18446 (36.1) | 5066 (35.1) | 2.2 | 0 | 18446 (36.1) | 5066 (35.1) | 2.2 | 0 | |
| 85+ | 7734 (15.1) | 1994 (13.8) | 3.8 | 0.1 | 7734 (15.1) | 1994 (13.8) | 3.8 | 0.1 | 7734 (15.1) | 1994 (13.8) | 3.8 | 0.1 | 7734 (15.1) | 1994 (13.8) | 3.8 | 0.1 | |
| Female sex | 30977 (60.6) | 9082 (62.9) | 4.6 | 0.5 | 30977 (60.6) | 31671 (61.7) | 2.2 | 0.6 | 5008 (47.3) | 668 (42.8) | 9.1 | 2.7 | 5676 (46.7) | 24340 (55) | 16.6 | 0.6 | |
| Race |  |  |  |  |  |  |  |  |  |  |  |  |  |  |  |  | |
| Caucasian | 43446 (85) | 12004 (83.1) | 5.3 | 0.1 | 43446 (85) | 43906 (85.5) | 1.4 | 0.2 | 9386 (88.6) | 1426 (91.3) | 8.9 | 6 | 10812 (89) | 38227 (86.4) | 7.9 | 1.2 | |
| African American | 1788 (3.5) | 629 (4.4) | 4.4 | 0 | 1788 (3.5) | 1572 (3.1) | 2.5 | 0.1 | 310 (2.9) | 33 (2.1) | 5.2 | 1.8 | 343 (2.8) | 1200 (2.7) | 0.7 | 0.9 | |
| Others | 5865 (11.5) | 1814 (12.6) | 3.3 | 0.1 | 5865 (11.5) | 5852 (11.4) | 0.2 | 0.2 | 894 (8.4) | 103 (6.6) | 7 | 5.8 | 997 (8.2) | 4825 (10.9) | 9.2 | 1.8 | |
| Recent hospitalization in the past 30 days | 4710 (9.2) | 1261 (8.7) | 1.7 | 0.4 | 4710 (9.2) | 1530 (3) | 26.3 | 1 | 1033 (9.8) | 149 (9.5) | 0.7 | 0.3 | 1182 (9.7) | 9732 (22) | 34.1 | 0.4 | |
| Number of distinct prescriptions |  |  |  |  |  |  |  |  |  |  |  |  |  |  |  |  | |
| 0-2 | 2573 (5) | 734 (5.1) | 0.2 | 0 | 2573 (5) | 8611 (16.8) | 38.4 | 1.4 | 184 (1.7) | 20 (1.3) | 3.8 | 1.7 | 204 (1.7) | 1606 (3.6) | 12.2 | 1.2 | |
| 3-4 | 4868 (9.5) | 1280 (8.9) | 2.3 | 0.1 | 4868 (9.5) | 10413 (20.3) | 30.6 | 0.4 | 727 (6.9) | 108 (6.9) | 0.2 | 0.9 | 835 (6.9) | 3447 (7.8) | 3.5 | 1.4 | |
| 5-7 | 10728 (21) | 2711 (18.8) | 5.6 | 0.2 | 10728 (21) | 14443 (28.1) | 16.7 | 0.2 | 2314 (21.9) | 296 (19) | 7.2 | 1.7 | 2610 (21.5) | 8264 (18.7) | 7 | 1.2 | |
| >7 | 32930 (64.4) | 9722 (67.3) | 6 | 0.1 | 32930 (64.4) | 17863 (34.8) | 62.1 | 1.2 | 7365 (69.5) | 1138 (72.9) | 7.3 | 1.5 | 8503 (70) | 30935 (69.9) | 0.1 | 2.3 | |
| Number of hospitalizations |  |  |  |  |  |  |  |  |  |  |  |  |  |  |  |  | |
| 0-1 | 16006 (31.3) | 4444 (30.8) | 1.2 | 0.3 | 16006 (31.3) | 8078 (15.7) | 37.4 | 0.4 | 3416 (32.3) | 547 (35) | 5.8 | 3.4 | 3963 (32.6) | 16992 (38.4) | 12.1 | 2 | |
| >1 | 10872 (21.3) | 3338 (23.1) | 4.4 | 0.2 | 10872 (21.3) | 3791 (7.4) | 40.4 | 1.5 | 2622 (24.8) | 365 (23.4) | 3.3 | 0.3 | 2987 (24.6) | 14154 (32) | 16.5 | 1.8 | |
| Length of stay in hospital in days |  |  |  |  |  |  |  |  |  |  |  |  |  |  |  |  | |
| 1-3 | 4265 (8.3) | 1105 (7.6) | 2.6 | 0.1 | 4265 (8.3) | 2965 (5.8) | 10 | 0.1 | 1061 (10) | 239 (15.3) | 15.9 | 1.8 | 1300 (10.7) | 3991 (9) | 5.6 | 1.1 | |
| >3 | 22613 (44.3) | 6677 (46.2) | 3.9 | 0.6 | 22613 (44.3) | 8904 (17.3) | 60.9 | 1.5 | 4977 (47) | 673 (43.1) | 7.9 | 4 | 5650 (46.5) | 27155 (61.4) | 30.2 | 0.4 | |
| Number of office visits |  |  |  |  |  |  |  |  |  |  |  |  |  |  |  |  | |
| 0-1 | 2020 (4) | 583 (4) | 0.4 | 0.1 | 2020 (4) | 2517 (4.9) | 4.6 | 0.2 | 313 (3) | 30 (1.9) | 6.7 | 1 | 343 (2.8) | 2182 (4.9) | 10.9 | 1.7 | |
| 2-3 | 3240 (6.3) | 960 (6.6) | 1.2 | 0.2 | 3240 (6.3) | 5409 (10.5) | 15.1 | 0.8 | 593 (5.6) | 53 (3.4) | 10.7 | 2.4 | 646 (5.3) | 2896 (6.5) | 5.2 | 1.7 | |
| 4-5 | 4750 (9.3) | 1366 (9.5) | 0.5 | 0.1 | 4750 (9.3) | 6964 (13.6) | 13.5 | 0.3 | 991 (9.4) | 135 (8.6) | 2.5 | 3.4 | 1126 (9.3) | 4020 (9.1) | 0.6 | 1.7 | |
| >5 | 41089 (80.4) | 11538 (79.9) | 1.4 | 0 | 41089 (80.4) | 36440 (71) | 22.1 | 0.6 | 8693 (82.1) | 1344 (86) | 10.8 | 3.6 | 10037 (82.6) | 35154 (79.4) | 8.1 | 3.2 | |
| Urinary tract infection | 14166 (27.7) | 4038 (28) | 0.5 | 0.1 | 14166 (27.7) | 10046 (19.6) | 19.3 | 0.3 | 2757 (26) | 358 (22.9) | 7.2 | 1.9 | 3115 (25.6) | 15184 (34.3) | 19 | 0.4 | |
| Surgical site infection | 1853 (3.6) | 647 (4.5) | 4.3 | 0 | 1853 (3.6) | 1224 (2.4) | 7.3 | 0.1 | 403 (3.8) | 49 (3.1) | 3.7 | 2.1 | 452 (3.7) | 2276 (5.1) | 6.9 | 1 | |
| Clostridium difficile infection | 956 (1.9) | 338 (2.3) | 3.3 | 0 | 956 (1.9) | 423 (0.8) | 9.1 | 0.2 | 190 (1.8) | 15 (1) | 7.2 | 5.8 | 205 (1.7) | 1589 (3.6) | 11.9 | 0.8 | |
| Other bacterial infection | 8992 (17.6) | 2666 (18.5) | 2.2 | 0.2 | 8992 (17.6) | 6263 (12.2) | 15.2 | 0.3 | 2200 (20.8) | 272 (17.4) | 8.6 | 1.5 | 2472 (20.3) | 10822 (24.5) | 9.9 | 0.8 | |
| Hyperkalemia | 1797 (3.5) | 671 (4.6) | 5.7 | 0.1 | 1797 (3.5) | 705 (1.4) | 13.9 | 1 | 523 (4.9) | 68 (4.4) | 2.8 | 1.2 | 591 (4.9) | 2505 (5.7) | 3.6 | 0.4 | |
| Pneumonia | 8278 (16.2) | 2515 (17.4) | 3.2 | 0.2 | 8278 (16.2) | 3820 (7.4) | 27.4 | 0.9 | 1834 (17.3) | 206 (13.2) | 11.5 | 3.1 | 2040 (16.8) | 11011 (24.9) | 20 | 0.3 | |
| Sepsis/septicemia | 2460 (4.8) | 831 (5.8) | 4.2 | 0 | 2460 (4.8) | 897 (1.7) | 17.3 | 0.6 | 515 (4.9) | 46 (2.9) | 9.9 | 0.6 | 561 (4.6) | 3942 (8.9) | 17.2 | 0.1 | |
| Coronary artery disease | 20873 (40.8) | 5937 (41.1) | 0.5 | 0.2 | 20873 (40.8) | 13959 (27.2) | 29.1 | 1 | 5921 (55.9) | 803 (51.4) | 9 | 2.6 | 6724 (55.3) | 24053 (54.4) | 2 | 3.7 | |
| Systemic embolism | 787 (1.5) | 258 (1.8) | 1.9 | 0.1 | 787 (1.5) | 392 (0.8) | 7.3 | 0.4 | 227 (2.1) | 27 (1.7) | 3 | 0.8 | 254 (2.1) | 949 (2.1) | 0.4 | 2.2 | |
| DVT | 3441 (6.7) | 1054 (7.3) | 2.2 | 0.1 | 3441 (6.7) | 1985 (3.9) | 12.8 | 0.4 | 1018 (9.6) | 85 (5.4) | 15.9 | 2 | 1103 (9.1) | 3646 (8.2) | 3 | 2.7 | |
| Pulmonary embolism | 1548 (3) | 450 (3.1) | 0.5 | 0 | 1548 (3) | 765 (1.5) | 10.4 | 0.4 | 482 (4.6) | 38 (2.4) | 11.6 | 0.9 | 520 (4.3) | 1537 (3.5) | 4.2 | 2.5 | |
| Atrial fibrillation/flutter | 12796 (25) | 3327 (23) | 4.7 | 0.4 | 12796 (25) | 8539 (16.6) | 20.8 | 0.7 | 10299 (97.3) | 1552 (99.4) | 16.4 | 5.2 | 11851 (97.5) | 44252 (100) | 22.5 | 10.5 | |
| Hypertension | 45439 (88.9) | 12810 (88.7) | 0.8 | 0 | 45439 (88.9) | 41836 (81.5) | 21 | 0.6 | 10411 (98.3) | 1542 (98.7) | 3.4 | 3.8 | 11953 (98.4) | 42602 (96.3) | 13 | 3.3 | |
| Diabetes | 14277 (27.9) | 4129 (28.6) | 1.4 | 0 | 14277 (27.9) | 10807 (21.1) | 16.1 | 0.7 | 3135 (29.6) | 371 (23.8) | 13.3 | 0.1 | 3506 (28.9) | 12979 (29.3) | 1.1 | 3 | |
| Hyperlipidemia | 38456 (75.3) | 10769 (74.5) | 1.7 | 0 | 38456 (75.3) | 36467 (71) | 9.5 | 0.4 | 8208 (77.5) | 1257 (80.5) | 7.3 | 6.4 | 9465 (77.9) | 33462 (75.6) | 5.4 | 3.7 | |
| Heart failure | 9589 (18.8) | 2660 (18.4) | 0.9 | 0.2 | 9589 (18.8) | 4348 (8.5) | 30.4 | 1.2 | 3994 (37.7) | 460 (29.4) | 17.6 | 5.4 | 4454 (36.7) | 13894 (31.4) | 11.1 | 3.5 | |
| Hemorrhagic stroke | 1078 (2.1) | 464 (3.2) | 6.9 | 0.4 | 1078 (2.1) | 381 (0.7) | 11.6 | 0.8 | 183 (1.7) | 20 (1.3) | 3.7 | 2.1 | 203 (1.7) | 1903 (4.3) | 15.5 | 2.5 | |
| Ischemic stroke | 5315 (10.4) | 1801 (12.5) | 6.5 | 0.1 | 5315 (10.4) | 3208 (6.2) | 15.1 | 0.5 | 1708 (16.1) | 226 (14.5) | 4.6 | 5.3 | 1934 (15.9) | 7275 (16.4) | 1.4 | 2.4 | |
| Other stroke | 1818 (3.6) | 633 (4.4) | 4.2 | 0.3 | 1818 (3.6) | 1041 (2) | 9.3 | 0.1 | 666 (6.3) | 76 (4.9) | 6.2 | 4.2 | 742 (6.1) | 2881 (6.5) | 1.7 | 1.6 | |
| Transient ischemic attack | 2552 (5) | 807 (5.6) | 2.6 | 0.1 | 2552 (5) | 1722 (3.4) | 8.2 | 0.2 | 819 (7.7) | 119 (7.6) | 0.4 | 1 | 938 (7.7) | 3676 (8.3) | 2.2 | 2.4 | |
| COPD | 11377 (22.3) | 3212 (22.2) | 0.1 | 0.1 | 11377 (22.3) | 6695 (13) | 24.4 | 0.5 | 2272 (21.5) | 282 (18.1) | 8.5 | 0.2 | 2554 (21) | 11836 (26.7) | 13.5 | 0.8 | |
| Asthma | 7206 (14.1) | 2090 (14.5) | 1 | 0.3 | 7206 (14.1) | 4585 (8.9) | 16.2 | 0.2 | 1202 (11.4) | 191 (12.2) | 2.7 | 3.2 | 1393 (11.5) | 5880 (13.3) | 5.5 | 1.7 | |
| Alcohol abuse | 963 (1.9) | 275 (1.9) | 0.1 | 0.3 | 963 (1.9) | 432 (0.8) | 9 | 0.7 | 175 (1.7) | 34 (2.2) | 3.8 | 1 | 209 (1.7) | 1205 (2.7) | 6.8 | 0.3 | |
| Drug abuse | 420 (0.8) | 153 (1.1) | 2.5 | 0.2 | 420 (0.8) | 156 (0.3) | 6.9 | 0.1 | 68 (0.6) | 16 (1) | 4.2 | 1.6 | 84 (0.7) | 572 (1.3) | 6.1 | 1.5 | |
| Epilepsy | 2434 (4.8) | 867 (6) | 5.5 | 0.3 | 2434 (4.8) | 1525 (3) | 9.3 | 0.3 | 393 (3.7) | 56 (3.6) | 0.7 | 0.5 | 449 (3.7) | 2816 (6.4) | 12.2 | 1.5 | |
| Dementia | 6467 (12.7) | 1804 (12.5) | 0.5 | 0.2 | 6467 (12.7) | 4875 (9.5) | 10.1 | 0.1 | 1259 (11.9) | 176 (11.3) | 1.9 | 8.1 | 1435 (11.8) | 8901 (20.1) | 22.8 | 2.4 | |
| Depression | 13350 (26.1) | 3887 (26.9) | 1.8 | 0.3 | 13350 (26.1) | 9493 (18.5) | 18.4 | 0.1 | 1999 (18.9) | 333 (21.3) | 6.1 | 4.2 | 2332 (19.2) | 11754 (26.6) | 17.6 | 1.9 | |
| Old myocardial infarction | 5212 (10.2) | 1652 (11.4) | 4 | 0.1 | 5212 (10.2) | 2829 (5.5) | 17.5 | 0.6 | 1509 (14.2) | 202 (12.9) | 3.8 | 3.6 | 1711 (14.1) | 6488 (14.7) | 1.7 | 1.7 | |
| Acute myocardial infarction | 3819 (7.5) | 1276 (8.8) | 5 | 0.1 | 3819 (7.5) | 1304 (2.5) | 22.8 | 0.9 | 1047 (9.9) | 141 (9) | 2.9 | 1.3 | 1188 (9.8) | 5665 (12.8) | 9.6 | 0.9 | |
| Upper GI bleeding | 1493 (2.9) | 292 (2) | 5.8 | 1.4 | 1493 (2.9) | 275 (0.5) | 18.4 | 3.4 | 181 (1.7) | 28 (1.8) | 0.6 | 2.8 | 209 (1.7) | 1361 (3.1) | 8.9 | 0.2 | |
| Lower GI bleeding | 6544 (12.8) | 1515 (10.5) | 7.2 | 1 | 6544 (12.8) | 2950 (5.7) | 24.5 | 1.9 | 1085 (10.2) | 156 (10) | 0.9 | 0.1 | 1241 (10.2) | 6187 (14) | 11.6 | 0.4 | |
| Peripheral vascular disease | 6709 (13.1) | 1984 (13.7) | 1.8 | 0.1 | 6709 (13.1) | 4604 (9) | 13.3 | 0.3 | 1914 (18.1) | 174 (11.1) | 19.7 | 4.3 | 2088 (17.2) | 7516 (17) | 0.5 | 2.8 | |
| Liver disease | 6317 (12.4) | 1666 (11.5) | 2.6 | 0.4 | 6317 (12.4) | 3469 (6.8) | 19.1 | 0.5 | 915 (8.6) | 114 (7.3) | 5 | 0.3 | 1029 (8.5) | 5086 (11.5) | 10.1 | 0.3 | |
| Renal dysfunction | 16566 (32.4) | 4649 (32.2) | 0.5 | 0.1 | 16566 (32.4) | 10073 (19.6) | 29.5 | 1.1 | 3872 (36.6) | 449 (28.7) | 16.7 | 3.5 | 4321 (35.6) | 17294 (39.1) | 7.3 | 2 | |
| Acute renal disease | 6464 (12.6) | 1884 (13) | 1.2 | 0.4 | 6464 (12.6) | 2344 (4.6) | 29.1 | 1.1 | 1568 (14.8) | 169 (10.8) | 11.9 | 4.9 | 1737 (14.3) | 8914 (20.1) | 15.5 | 1.4 | |
| End-stage renal disease | 1539 (3) | 488 (3.4) | 2.1 | 0.2 | 1539 (3) | 680 (1.3) | 11.6 | 0.5 | 461 (4.4) | 13 (0.8) | 22.3 | 5 | 474 (3.9) | 1830 (4.1) | 1.2 | 1.4 | |
| Osteoarthritis | 19696 (38.5) | 5373 (37.2) | 2.8 | 0.1 | 19696 (38.5) | 16744 (32.6) | 12.4 | 0.1 | 3817 (36) | 581 (37.2) | 2.4 | 3.3 | 4398 (36.2) | 16548 (37.4) | 2.5 | 1.1 | |
| Rheumatoid arthritis | 2319 (4.5) | 581 (4) | 2.6 | 0.1 | 2319 (4.5) | 1510 (2.9) | 8.4 | 0.1 | 327 (3.1) | 58 (3.7) | 3.5 | 0.4 | 385 (3.2) | 1757 (4) | 4.3 | 0.7 | |
| Neuropathic pain | 14367 (28.1) | 3997 (27.7) | 1 | 0.1 | 14367 (28.1) | 11553 (22.5) | 12.9 | 0.3 | 2637 (24.9) | 386 (24.7) | 0.4 | 2.6 | 3023 (24.9) | 11486 (26) | 2.5 | 3.5 | |
| Back/neck pain | 22855 (44.7) | 6412 (44.4) | 0.7 | 0.2 | 22855 (44.7) | 17826 (34.7) | 20.5 | 0.3 | 3967 (37.5) | 590 (37.8) | 0.6 | 2.2 | 4557 (37.5) | 19078 (43.1) | 11.5 | 0.9 | |
| Osteoporosis | 10017 (19.6) | 2876 (19.9) | 0.8 | 0.1 | 10017 (19.6) | 9242 (18) | 4.1 | 0.1 | 1602 (15.1) | 207 (13.3) | 5.4 | 3.1 | 1809 (14.9) | 8373 (18.9) | 10.8 | 0.2 | |
| Fibromyalgia | 4359 (8.5) | 1232 (8.5) | 0 | 0.5 | 4359 (8.5) | 3227 (6.3) | 8.6 | 0.2 | 604 (5.7) | 113 (7.2) | 6.2 | 2.6 | 717 (5.9) | 2889 (6.5) | 2.6 | 0.2 | |
| Migraine | 1572 (3.1) | 491 (3.4) | 1.8 | 0.4 | 1572 (3.1) | 1163 (2.3) | 5 | 0.1 | 187 (1.8) | 46 (2.9) | 7.8 | 3.3 | 233 (1.9) | 1073 (2.4) | 3.5 | 0.1 | |
| Headache | 7566 (14.8) | 2275 (15.7) | 2.6 | 0.1 | 7566 (14.8) | 4785 (9.3) | 16.9 | 0.1 | 1279 (12.1) | 210 (13.4) | 4.1 | 3.1 | 1489 (12.3) | 7068 (16) | 10.7 | 1.9 | |
| Other pain | 6702 (13.1) | 2004 (13.9) | 2.2 | 0 | 6702 (13.1) | 3356 (6.5) | 22.2 | 0.6 | 975 (9.2) | 140 (9) | 0.8 | 4.6 | 1115 (9.2) | 6491 (14.7) | 17 | 1.2 | |
| Generalized pain | 1487 (2.9) | 432 (3) | 0.5 | 0.1 | 1487 (2.9) | 699 (1.4) | 10.7 | 0.2 | 247 (2.3) | 27 (1.7) | 4.3 | 2.5 | 274 (2.3) | 1424 (3.2) | 5.9 | 0.1 | |
| Pain disorders related to psychological factors | 117 (0.2) | 30 (0.2) | 0.5 | 0.1 | 117 (0.2) | 71 (0.1) | 2.1 | 0.1 | <11 | <11 | - | - | 14 (0.1) | 89 (0.2) | 2.2 | 0.1 | |
| Fracture | 6908 (13.5) | 1870 (12.9) | 1.7 | 0.2 | 6908 (13.5) | 5006 (9.8) | 11.8 | 0.1 | 1339 (12.6) | 158 (10.1) | 8 | 3 | 1497 (12.3) | 7302 (16.5) | 11.9 | 0.1 | |
| Falls | 6510 (12.7) | 1879 (13) | 0.8 | 0.1 | 6510 (12.7) | 4374 (8.5) | 13.7 | 0.3 | 1581 (14.9) | 174 (11.1) | 11.3 | 2.3 | 1755 (14.4) | 7832 (17.7) | 8.9 | 0 | |
| Parkinson | 1149 (2.2) | 288 (2) | 1.8 | 0.3 | 1149 (2.2) | 1136 (2.2) | 0.2 | 0.1 | 177 (1.7) | 16 (1) | 5.6 | 1.4 | 193 (1.6) | 1119 (2.5) | 6.6 | 0.9 | |
| Anemia | 21888 (42.8) | 5787 (40.1) | 5.6 | 0.7 | 21888 (42.8) | 13257 (25.8) | 36.4 | 1.2 | 4159 (39.3) | 502 (32.1) | 14.9 | 0.6 | 4661 (38.4) | 21631 (48.9) | 21.3 | 1 | |
| HIV/AIDS | 93 (0.2) | 23 (0.2) | 0.6 | 0.2 | 93 (0.2) | 79 (0.2) | 0.7 | 0.2 | 16 (0.2) | <11 | - | - | 17 (0.1) | 51 (0.1) | 0.7 | 0.3 | |
| Acetaminophen | 24231 (47.4) | 7665 (53.1) | 11.3 | 0.1 | 24231 (47.4) | 15374 (30) | 36.5 | 1.2 | 4848 (45.8) | 716 (45.8) | 0.1 | 0.8 | 5564 (45.8) | 21929 (49.6) | 7.5 | 0.2 | |
| Antibiotics | 35370 (69.2) | 10088 (69.8) | 1.3 | 0.1 | 35370 (69.2) | 29308 (57.1) | 25.3 | 0.7 | 6926 (65.4) | 1074 (68.8) | 7.1 | 1.3 | 8000 (65.8) | 31707 (71.7) | 12.6 | 1 | |
| Oral corticosteroid | 14550 (28.5) | 4526 (31.3) | 6.2 | 0.2 | 14550 (28.5) | 9209 (17.9) | 25.1 | 0.7 | 2426 (22.9) | 371 (23.8) | 2 | 3.2 | 2797 (23) | 11621 (26.3) | 7.5 | 1.4 | |
| Antiplatelet | 4640 (9.1) | 1914 (13.2) | 13.3 | 0.4 | 4640 (9.1) | 3195 (6.2) | 10.8 | 0.3 | 757 (7.1) | 139 (8.9) | 6.4 | 2.9 | 896 (7.4) | 5654 (12.8) | 18 | 1.9 | |
| Antipsychotics | 3379 (6.6) | 1140 (7.9) | 4.9 | 0.4 | 3379 (6.6) | 2105 (4.1) | 11.2 | 0.3 | 462 (4.4) | 76 (4.9) | 2.4 | 5.3 | 538 (4.4) | 4222 (9.5) | 20.2 | 1 | |
| Anticonvulsant | 9688 (19) | 2960 (20.5) | 3.8 | 0.3 | 9688 (19) | 6286 (12.2) | 18.6 | 0.1 | 1394 (13.2) | 231 (14.8) | 4.7 | 4.7 | 1625 (13.4) | 7377 (16.7) | 9.2 | 0.5 | |

Abbreviations: ASMDc=crude absolute standardized mean difference; ASMDw=weighted absolute standardized mean difference; COPD=chronic obstructive pulmonary disease; DOAC= direct oral anticoagulants; DVT=deep vein thromboembolism; GI=gastrointestinal; HIV/AIDS= human immunodeficiency virus/acquired immunodeficiency syndrome; H2RA= histamine type-2 receptor antagonists; OAC=oral anticoagulant; PPI=proton pump inhibitor; SD=standard deviation.

**Table S3. Patients’ characteristics and absolute standardized mean difference before and after propensity score decile adjustment, NC system**

|  | **PPI vs. H2RA and pneumonia** | | | | **PPI vs. non-PPI and pneumonia** | | | | **Warfarin vs. DOAC and bleeding** | | | | **OAC vs. non-OAC and bleeding** | | | | |
| --- | --- | --- | --- | --- | --- | --- | --- | --- | --- | --- | --- | --- | --- | --- | --- | --- | --- |
| Variable | PPI | H2RA | ASMDc | ASMDw | PPI | Non-PPI | ASMDc | ASMDw | Warfarin | DOAC | ASMDc | ASMDw | OAC | Non-OAC | ASMDc | | ASMDw |
| Total | 5620 | 1421 |  |  | 5620 | 5694 |  |  | 859 | 266 |  |  | 1125 | 5103 |  |  | |
| Age in years, mean (SD) | 75.2 (7.3) | 74.9 (7.3) | 4.4 | 0.2 | 75.2 (7.3) | 75.4 (7.4) | 2.8 | 0.6 | 77.4 (7.2) | 76.4 (7) | 13.9 | 1 | 77.2 (7.1) | 77.8 (7.6) | 9 | 7.9 | |
| Age groups |  |  |  |  |  |  |  |  |  |  |  |  |  |  |  |  | |
| 65-74 | 2975 (52.9) | 785 (55.2) | 4.6 | 0.8 | 2975 (52.9) | 2960 (52) | 1.9 | 0.9 | 326 (38) | 115 (43.2) | 10.8 | 5.1 | 441 (39.2) | 1916 (37.5) | 3.4 | 5 | |
| 75-84 | 1938 (34.5) | 472 (33.2) | 2.7 | 1.4 | 1938 (34.5) | 1955 (34.3) | 0.3 | 1 | 373 (43.4) | 110 (41.4) | 4.2 | 5.5 | 483 (42.9) | 2076 (40.7) | 4.6 | 2.6 | |
| 85+ | 707 (12.6) | 164 (11.5) | 3.2 | 0.8 | 707 (12.6) | 779 (13.7) | 3.3 | 0.1 | 160 (18.6) | 41 (15.4) | 8.6 | 0.7 | 201 (17.9) | 1111 (21.8) | 9.8 | 2.9 | |
| Female | 3411 (60.7) | 813 (57.2) | 7.1 | 0.7 | 3411 (60.7) | 3448 (60.6) | 0.3 | 1 | 437 (50.9) | 121 (45.5) | 10.8 | 0.7 | 558 (49.6) | 2909 (57) | 14.9 | 8.3 | |
| Race |  |  |  |  |  |  |  |  |  |  |  |  |  |  |  |  | |
| Caucasian | 4888 (87) | 1195 (84.1) | 8.2 | 0.7 | 4888 (87) | 5219 (91.7) | 15.2 | 0.1 | 771 (89.8) | Not reportable | - | - | 1031 (91.6) | 4712 (92.3) | 2.6 | 1.8 | |
| African American | 610 (10.9) | 186 (13.1) | 6.9 | 0.5 | 610 (10.9) | 374 (6.6) | 15.2 | 0.4 | 73 (8.5) | <11 | - | - | 78 (6.9) | 351 (6.9) | 0.2 | 1.2 | |
| Others | 122 (2.2) | 40 (2.8) | 4.1 | 0.5 | 122 (2.2) | 101 (1.8) | 2.9 | 0.9 | 15 (1.7) | <11 | - | - | 16 (1.4) | 40 (0.8) | 6.1 | 1.8 | |
| Recent hospitalization in the past 30 days | 471 (8.4) | 141 (9.9) | 5.3 | 0.9 | 471 (8.4) | 166 (2.9) | 23.8 | 1 | 77 (9) | 31 (11.7) | 8.9 | 4.5 | 108 (9.6) | 1491 (29.2) | 51.2 | 14.3 | |
| Number of distinct prescriptions |  |  |  |  |  |  |  |  |  |  |  |  |  |  |  |  | |
| 0-2 | 265 (4.7) | 81 (5.7) | 4.4 | 0.5 | 265 (4.7) | 647 (11.4) | 24.6 | 3.1 | 15 (1.7) | 2 (0.8) | 9 | 6.9 | 17 (1.5) | 202 (4) | 15 | 2.1 | |
| 3-4 | 419 (7.5) | 99 (7) | 1.9 | 1.5 | 419 (7.5) | 889 (15.6) | 25.7 | 1.2 | 59 (6.9) | 22 (8.3) | 5.3 | 1.7 | 81 (7.2) | 385 (7.5) | 1.3 | 4.6 | |
| 5-7 | 1249 (22.2) | 316 (22.2) | 0 | 0.3 | 1249 (22.2) | 1578 (27.7) | 12.7 | 1.2 | 179 (20.8) | 53 (19.9) | 2.3 | 5.8 | 232 (20.6) | 1073 (21) | 1 | 1.3 | |
| >7 | 3687 (65.6) | 925 (65.1) | 1.1 | 0.8 | 3687 (65.6) | 2580 (45.3) | 41.7 | 1.3 | 606 (70.5) | 189 (71.1) | 1.1 | 7.8 | 795 (70.7) | 3443 (67.5) | 6.9 | 4.5 | |
| Number of hospitalizations |  |  |  |  |  |  |  |  |  |  |  |  |  |  |  |  | |
| 0-1 | 2061 (36.7) | 554 (39) | 4.8 | 0.6 | 2061 (36.7) | 956 (16.8) | 46.1 | 0.8 | 294 (34.2) | 86 (32.3) | 4 | 3.7 | 380 (33.8) | 1956 (38.3) | 9.5 | 3.7 | |
| >1 | 1533 (27.3) | 444 (31.2) | 8.7 | 0.3 | 1533 (27.3) | 426 (7.5) | 54.1 | 1.5 | 237 (27.6) | 83 (31.2) | 7.9 | 1.4 | 320 (28.4) | 1823 (35.7) | 15.6 | 0.9 | |
| Length of stay in hospital in days |  |  |  |  |  |  |  |  |  |  |  |  |  |  |  |  | |
| 1-3 | 564 (10) | 137 (9.6) | 1.3 | 0.8 | 564 (10) | 352 (6.2) | 14.2 | 0.7 | 90 (10.5) | 35 (13.2) | 8.3 | 4.5 | 125 (11.1) | 492 (9.6) | 4.8 | 0.4 | |
| >3 | 3030 (53.9) | 861 (60.6) | 13.5 | 0.1 | 3030 (53.9) | 1030 (18.1) | 80.4 | 2.3 | 441 (51.3) | 134 (50.4) | 1.9 | 1.9 | 575 (51.1) | 3286 (64.4) | 27.1 | 4.3 | |
| Number of office visits |  |  |  |  |  |  |  |  |  |  |  |  |  |  |  |  | |
| 0-1 | 192 (3.4) | 84 (5.9) | 11.9 | 0.1 | 192 (3.4) | 225 (4) | 2.8 | 0.4 | 25 (2.9) | 2 (0.8) | 16.2 | 5.9 | 27 (2.4) | 239 (4.7) | 12.4 | 7.6 | |
| 2-3 | 347 (6.2) | 89 (6.3) | 0.4 | 1.7 | 347 (6.2) | 455 (8) | 7.1 | 0.4 | 26 (3) | 5 (1.9) | 7.4 | 3.7 | 31 (2.8) | 329 (6.4) | 17.7 | 5.8 | |
| 4-5 | 511 (9.1) | 131 (9.2) | 0.4 | 0.2 | 511 (9.1) | 656 (11.5) | 8 | 0 | 45 (5.2) | 15 (5.6) | 1.8 | 1.7 | 60 (5.3) | 392 (7.7) | 9.5 | 1.1 | |
| >5 | 4570 (81.3) | 1117 (78.6) | 6.8 | 0.8 | 4570 (81.3) | 4358 (76.5) | 11.7 | 0 | 763 (88.8) | 244 (91.7) | 9.8 | 6 | 1007 (89.5) | 4143 (81.2) | 23.7 | 8.2 | |
| Urinary tract infection | 1852 (33) | 449 (31.6) | 2.9 | 0.7 | 1852 (33) | 1302 (22.9) | 22.6 | 0.8 | 246 (28.6) | 75 (28.2) | 1 | 7.3 | 321 (28.5) | 1951 (38.2) | 20.7 | 1.8 | |
| Surgical site infection | 226 (4) | 66 (4.6) | 3.1 | 0.9 | 226 (4) | 121 (2.1) | 11 | 0.2 | 35 (4.1) | <11 | - | - | 38 (3.4) | 238 (4.7) | 6.6 | 0.3 | |
| Clostridium difficile infection | 150 (2.7) | 70 (4.9) | 11.8 | 0.8 | 150 (2.7) | 53 (0.9) | 13.1 | 0.2 | 21 (2.4) | <11 | - | - | 29 (2.6) | 178 (3.5) | 5.3 | 2.6 | |
| Other bacterial infection | 1322 (23.5) | 399 (28.1) | 10.4 | 0.8 | 1322 (23.5) | 694 (12.2) | 29.9 | 2 | 220 (25.6) | 53 (19.9) | 13.6 | 2.9 | 273 (24.3) | 1363 (26.7) | 5.6 | 2.5 | |
| Hyperkalemia | 573 (10.2) | 203 (14.3) | 12.5 | 0.9 | 573 (10.2) | 121 (2.1) | 34.1 | 3.6 | 108 (12.6) | 18 (6.8) | 19.7 | 10.1 | 126 (11.2) | 674 (13.2) | 6.1 | 4.6 | |
| Pneumonia | 1189 (21.2) | 403 (28.4) | 16.7 | 0.2 | 1189 (21.2) | 577 (10.1) | 30.7 | 2.2 | 166 (19.3) | 51 (19.2) | 0.4 | 5.4 | 217 (19.3) | 1466 (28.7) | 22.2 | 1.3 | |
| Sepsis/septicemia | 636 (11.3) | 239 (16.8) | 15.9 | 0.3 | 636 (11.3) | 164 (2.9) | 33.3 | 2.9 | 94 (10.9) | 26 (9.8) | 3.8 | 5.9 | 120 (10.7) | 622 (12.2) | 4.8 | 1.7 | |
| Coronary artery disease | 2574 (45.8) | 720 (50.7) | 9.8 | 0.8 | 2574 (45.8) | 1763 (31) | 30.9 | 0.7 | 489 (56.9) | 138 (51.9) | 10.1 | 1.4 | 627 (55.7) | 2872 (56.3) | 1.1 | 3.1 | |
| Systemic embolism | 121 (2.2) | 35 (2.5) | 2.1 | 0.2 | 121 (2.2) | 34 (0.6) | 13.4 | 0 | 29 (3.4) | <11 | - | - | 35 (3.1) | 96 (1.9) | 7.9 | 3.7 | |
| DVT | 469 (8.3) | 133 (9.4) | 3.6 | 0.4 | 469 (8.3) | 231 (4.1) | 17.9 | 0.5 | 105 (12.2) | 22 (8.3) | 13.1 | 3.6 | 127 (11.3) | 578 (11.3) | 0.1 | 7.2 | |
| Pulmonary embolism | 246 (4.4) | 61 (4.3) | 0.4 | 0.8 | 246 (4.4) | 119 (2.1) | 13 | 1.7 | 57 (6.6) | 12 (4.5) | 9.3 | 4.6 | 69 (6.1) | 157 (3.1) | 14.6 | 6.8 | |
| Atrial fibrillation/flutter | 1441 (25.6) | 392 (27.6) | 4.4 | 1.3 | 1441 (25.6) | 910 (16) | 24 | 1.5 | 850 (99) | 266 (100) | 14.6 | 12.7 | 1116 (99.2) | 5103 (100) | 12.7 | 7.4 | |
| Hypertension | 5131 (91.3) | 1297 (91.3) | 0.1 | 1.3 | 5131 (91.3) | 4839 (85) | 19.6 | 1.1 | 839 (97.7) | 264 (99.2) | 12.8 | 6.5 | 1103 (98) | 4956 (97.1) | 6 | 6 | |
| Diabetes | 2102 (37.4) | 552 (38.8) | 3 | 0.6 | 2102 (37.4) | 1699 (29.8) | 16.1 | 1.3 | 357 (41.6) | 97 (36.5) | 10.5 | 6 | 454 (40.4) | 1895 (37.1) | 6.6 | 1.4 | |
| Hyperlipidemia | 4320 (76.9) | 1099 (77.3) | 1.1 | 0.6 | 4320 (76.9) | 4148 (72.8) | 9.3 | 0.9 | 679 (79) | 217 (81.6) | 6.4 | 4.6 | 896 (79.6) | 3833 (75.1) | 10.8 | 14.2 | |
| Heart failure | 1302 (23.2) | 351 (24.7) | 3.6 | 0.2 | 1302 (23.2) | 553 (9.7) | 36.9 | 0.9 | 337 (39.2) | 88 (33.1) | 12.8 | 2.7 | 425 (37.8) | 1943 (38.1) | 0.6 | 1.4 | |
| Hemorrhagic stroke | 143 (2.5) | 90 (6.3) | 18.5 | 0.3 | 143 (2.5) | 30 (0.5) | 16.5 | 2.1 | <11 | <11 | - | - | 14 (1.2) | 164 (3.2) | 13.4 | 2.5 | |
| Ischemic stroke | 649 (11.5) | 233 (16.4) | 14 | 1.3 | 649 (11.5) | 399 (7) | 15.7 | 0.1 | 153 (17.8) | 42 (15.8) | 5.4 | 2.9 | 195 (17.3) | 744 (14.6) | 7.5 | 2 | |
| Other stroke | 249 (4.4) | 81 (5.7) | 5.8 | 0.4 | 249 (4.4) | 143 (2.5) | 10.5 | 0.1 | 56 (6.5) | 14 (5.3) | 5.3 | 2.6 | 70 (6.2) | 284 (5.6) | 2.8 | 3.4 | |
| Transient ischemic attack | 297 (5.3) | 102 (7.2) | 7.8 | 0.2 | 297 (5.3) | 232 (4.1) | 5.7 | 0.1 | 59 (6.9) | 23 (8.6) | 6.7 | 10.4 | 82 (7.3) | 391 (7.7) | 1.4 | 1.9 | |
| COPD | 1779 (31.7) | 475 (33.4) | 3.8 | 0.6 | 1779 (31.7) | 1096 (19.2) | 28.8 | 0.1 | 217 (25.3) | 77 (28.9) | 8.3 | 0.8 | 294 (26.1) | 1787 (35) | 19.4 | 1.9 | |
| Asthma | 787 (14) | 182 (12.8) | 3.5 | 1.6 | 787 (14) | 482 (8.5) | 17.6 | 0.4 | 76 (8.8) | 29 (10.9) | 6.9 | 2.3 | 105 (9.3) | 544 (10.7) | 4.4 | 5.2 | |
| Alcohol abuse | 106 (1.9) | 31 (2.2) | 2.1 | 0.4 | 106 (1.9) | 23 (0.4) | 14 | 1.8 | 13 (1.5) | <11 | - | - | 14 (1.2) | 105 (2.1) | 6.4 | 0.6 | |
| Drug abuse | 72 (1.3) | 29 (2) | 5.9 | 0.1 | 72 (1.3) | <11 | - | - | 12 (1.4) | <11 | - | - | 13 (1.2) | 60 (1.2) | 0.2 | 0.4 | |
| Epilepsy | 312 (5.6) | 110 (7.7) | 8.8 | 1.4 | 312 (5.6) | 183 (3.2) | 11.4 | 1.8 | 33 (3.8) | <11 | - | - | 43 (3.8) | 318 (6.2) | 11 | 1.9 | |
| Dementia | 859 (15.3) | 254 (17.9) | 7 | 0.3 | 859 (15.3) | 684 (12) | 9.5 | 0.2 | 131 (15.3) | 34 (12.8) | 7.1 | 5.7 | 165 (14.7) | 1086 (21.3) | 17.3 | 5.7 | |
| Depression | 1634 (29.1) | 430 (30.3) | 2.6 | 0.7 | 1634 (29.1) | 1132 (19.9) | 21.5 | 0.8 | 190 (22.1) | 58 (21.8) | 0.8 | 4.7 | 248 (22) | 1174 (23) | 2.3 | 1.5 | |
| Old myocardial infarction | 826 (14.7) | 254 (17.9) | 8.6 | 0.4 | 826 (14.7) | 438 (7.7) | 22.4 | 0.2 | 163 (19) | 41 (15.4) | 9.5 | 6.1 | 204 (18.1) | 912 (17.9) | 0.7 | 0.5 | |
| Acute myocardial infarction | 482 (8.6) | 152 (10.7) | 7.2 | 0.4 | 482 (8.6) | 173 (3) | 23.8 | 0.7 | 84 (9.8) | 21 (7.9) | 6.6 | 3.2 | 105 (9.3) | 578 (11.3) | 6.6 | 2.6 | |
| Upper GI bleeding | 206 (3.7) | 34 (2.4) | 7.4 | 2.3 | 206 (3.7) | 47 (0.8) | 19.3 | 1.5 | <11 | <11 | - | - | 13 (1.2) | 169 (3.3) | 14.6 | 1.1 | |
| Lower GI bleeding | 768 (13.7) | 144 (10.1) | 10.9 | 1.1 | 768 (13.7) | 293 (5.1) | 29.5 | 2.4 | 89 (10.4) | 31 (11.7) | 4.1 | 7.6 | 120 (10.7) | 754 (14.8) | 12.4 | 2.3 | |
| Peripheral vascular disease | 584 (10.4) | 176 (12.4) | 6.3 | 0 | 584 (10.4) | 331 (5.8) | 16.8 | 0.1 | 104 (12.1) | 23 (8.6) | 11.4 | 0.5 | 127 (11.3) | 629 (12.3) | 3.2 | 0.1 | |
| Liver disease | 648 (11.5) | 141 (9.9) | 5.2 | 1.6 | 648 (11.5) | 328 (5.8) | 20.6 | 0.6 | 62 (7.2) | 24 (9) | 6.6 | 2.2 | 86 (7.6) | 460 (9) | 5 | 3.1 | |
| Renal dysfunction | 2366 (42.1) | 659 (46.4) | 8.6 | 0.1 | 2366 (42.1) | 1395 (24.5) | 38 | 2.4 | 362 (42.1) | 100 (37.6) | 9.3 | 6.9 | 462 (41.1) | 2189 (42.9) | 3.7 | 3.9 | |
| Acute renal disease | 1093 (19.4) | 330 (23.2) | 9.2 | 0.8 | 1093 (19.4) | 333 (5.8) | 41.8 | 3.1 | 162 (18.9) | 54 (20.3) | 3.6 | 7.4 | 216 (19.2) | 1157 (22.7) | 8.5 | 5.7 | |
| End-stage renal disease | 375 (6.7) | 100 (7) | 1.4 | 0.2 | 375 (6.7) | 128 (2.2) | 21.6 | 2.3 | 48 (5.6) | <11 | - | - | 51 (4.5) | 366 (7.2) | 11.3 | 1.8 | |
| Osteoarthritis | 2409 (42.9) | 584 (41.1) | 3.6 | 0.3 | 2409 (42.9) | 1898 (33.3) | 19.7 | 0.6 | 332 (38.6) | 98 (36.8) | 3.7 | 6 | 430 (38.2) | 2115 (41.4) | 6.6 | 2.1 | |
| Rheumatoid arthritis | 264 (4.7) | 63 (4.4) | 1.3 | 0.2 | 264 (4.7) | 175 (3.1) | 8.4 | 0 | 27 (3.1) | <11 | - | - | 35 (3.1) | 213 (4.2) | 5.7 | 0.4 | |
| Neuropathic pain | 1742 (31) | 427 (30) | 2.1 | 0.7 | 1742 (31) | 1316 (23.1) | 17.8 | 1 | 220 (25.6) | 69 (25.9) | 0.8 | 2.5 | 289 (25.7) | 1139 (22.3) | 7.9 | 4.4 | |
| Back/neck pain | 2670 (47.5) | 674 (47.4) | 0.2 | 0.4 | 2670 (47.5) | 2172 (38.1) | 19 | 1.2 | 323 (37.6) | 128 (48.1) | 21.4 | 1.2 | 451 (40.1) | 1987 (38.9) | 2.4 | 4.3 | |
| Osteoporosis | 909 (16.2) | 208 (14.6) | 4.3 | 0.6 | 909 (16.2) | 830 (14.6) | 4.4 | 0.4 | 119 (13.9) | 40 (15) | 3.4 | 3.1 | 159 (14.1) | 898 (17.6) | 9.5 | 4.7 | |
| Fibromyalgia | 581 (10.3) | 158 (11.1) | 2.5 | 0.4 | 581 (10.3) | 419 (7.4) | 10.5 | 0.6 | 43 (5) | 19 (7.1) | 9 | 1.5 | 62 (5.5) | 385 (7.5) | 8.2 | 1.7 | |
| Migraine | 185 (3.3) | 53 (3.7) | 2.4 | 1.2 | 185 (3.3) | 144 (2.5) | 4.5 | 1 | 12 (1.4) | <11 | - | - | 15 (1.3) | 77 (1.5) | 1.5 | 0.5 | |
| Headache | 967 (17.2) | 236 (16.6) | 1.6 | 0.6 | 967 (17.2) | 564 (9.9) | 21.5 | 0.7 | 104 (12.1) | 47 (17.7) | 15.7 | 7.1 | 151 (13.4) | 690 (13.5) | 0.3 | 0.7 | |
| Other pain | 1440 (25.6) | 377 (26.5) | 2.1 | 0.2 | 1440 (25.6) | 707 (12.4) | 34.1 | 0.7 | 168 (19.6) | 59 (22.2) | 6.5 | 1.8 | 227 (20.2) | 818 (16) | 10.8 | 8 | |
| Generalized pain | 372 (6.6) | 91 (6.4) | 0.9 | 0.1 | 372 (6.6) | 169 (3) | 17.2 | 1.4 | 50 (5.8) | 16 (6) | 0.8 | 1.3 | 66 (5.9) | 203 (4) | 8.7 | 8.5 | |
| Pain disorders related to psychological factors | <11 | <11 | - | - | <11 | <11 | - | - | <11 | <11 | - | - | <11 | 12 (0.2) | - | - | |
| Fracture | 930 (16.5) | 256 (18) | 3.9 | 1.2 | 930 (16.5) | 551 (9.7) | 20.5 | 0.7 | 125 (14.6) | 34 (12.8) | 5.2 | 4.8 | 159 (14.1) | 909 (17.8) | 10.1 | 0.5 | |
| Falls | 941 (16.7) | 234 (16.5) | 0.7 | 0.7 | 941 (16.7) | 487 (8.6) | 24.8 | 1.9 | 143 (16.6) | 41 (15.4) | 3.4 | 4 | 184 (16.4) | 841 (16.5) | 0.3 | 0.6 | |
| Parkinson | 149 (2.7) | 45 (3.2) | 3.1 | 0.9 | 149 (2.7) | 155 (2.7) | 0.4 | 0.1 | 27 (3.1) | <11 | - | - | 32 (2.8) | 138 (2.7) | 0.9 | 0.1 | |
| Anemia | 2820 (50.2) | 757 (53.3) | 6.2 | 1.4 | 2820 (50.2) | 1675 (29.4) | 43.4 | 0.5 | 348 (40.5) | 108 (40.6) | 0.2 | 4.7 | 456 (40.5) | 2756 (54) | 27.2 | 0.7 | |
| HIV/AIDS | 13 (0.2) | <11 | - | - | 13 (0.2) | 13 (0.2) | 0.1 | 0.7 | <11 | <11 | - | - | <11 | <11 | - | - | |
| Acetaminophen | 2548 (45.3) | 619 (43.6) | 3.6 | 0.2 | 2548 (45.3) | 2062 (36.2) | 18.6 | 1.5 | 326 (38) | 109 (41) | 6.2 | 0.3 | 435 (38.7) | 2304 (45.1) | 13.2 | 2.2 | |
| Antibiotics | 4103 (73) | 1009 (71) | 4.5 | 0.1 | 4103 (73) | 3814 (67) | 13.2 | 0.2 | 589 (68.6) | 185 (69.5) | 2.1 | 4.7 | 774 (68.8) | 3826 (75) | 13.8 | 3.9 | |
| Oral corticosteroid | 1721 (30.6) | 452 (31.8) | 2.6 | 0 | 1721 (30.6) | 1326 (23.3) | 16.6 | 0.8 | 223 (26) | 68 (25.6) | 0.9 | 1.9 | 291 (25.9) | 1344 (26.3) | 1.1 | 0.5 | |
| Antiplatelet | 784 (14) | 298 (21) | 18.6 | 0.7 | 784 (14) | 589 (10.3) | 11.1 | 0 | 96 (11.2) | 28 (10.5) | 2.1 | 2.8 | 124 (11) | 805 (15.8) | 14 | 3.2 | |
| Antipsychotics | 343 (6.1) | 98 (6.9) | 3.2 | 0.1 | 343 (6.1) | 221 (3.9) | 10.2 | 1.3 | 23 (2.7) | <11 | - | - | 32 (2.8) | 277 (5.4) | 13 | 1.8 | |
| Anticonvulsant | 1441 (25.6) | 363 (25.5) | 0.2 | 0.9 | 1441 (25.6) | 1107 (19.4) | 14.9 | 1.9 | 179 (20.8) | 46 (17.3) | 9 | 4.1 | 225 (20) | 974 (19.1) | 2.3 | 0.5 | |

Abbreviations: ASMDc=crude absolute standardized mean difference; ASMDw=weighted absolute standardized mean difference; COPD=chronic obstructive pulmonary disease; DOAC= direct oral anticoagulants; DVT=deep vein thromboembolism; GI=gastrointestinal; HIV/AIDS= human immunodeficiency virus/acquired immunodeficiency syndrome; H2RA= histamine type-2 receptor antagonists; OAC=oral anticoagulant; PPI=proton pump inhibitor; SD=standard deviation.

**Table S4. List of predictors and corresponding coefficients for EHR-continuity prediction algorithm**

| **Variable** | **Coefficient** |
| --- | --- |
| Intercept | -0.010 |
| Having seen the same provider twice | 0.049 |
| Having seen the same provider ≥3 times | 0.087 |
| Having general medical exam* | 0.078 |
| Mammography* | 0.075 |
| Pap smear* | 0.009 |
| PSA Test* | 0.103 |
| Colonoscopy* | 0.064 |
| Fecal occult blood test* | 0.034 |
| Influenza vaccine* | 0.102 |
| Pneumococcal vaccine* | 0.031 |
| Having BMI recorded* | 0.017 |
| Having 2 of the above routine care facts** | 0.049 |
| With any one medication use record | 0.002 |
| With at least 2 medication use records | 0.074 |
| Having A1C ordered or value recorded* | 0.018 |
| Having at least one inpatient or outpatient encounter | 0.091 |
| Having at least two outpatient encounters | 0.050 |
| With 1 diagnosis recorded in the EHR | -0.026 |
| With at least 2 diagnoses recorded in the EHR | 0.037 |
| Having any ED visit in the EHR | 0.078 |

** having 2 of the facts followed by *

Abbreviations: BMI = body mass index; ED = emergency department; EHR=electronic health records; PSA= prostate specific antigen.

**Table S5. Number of patients, events, and follow-up time by exposure and EHR-continuity levels**

|  |  |  | **Exposure** | | |  | **Reference** | | |
| --- | --- | --- | --- | --- | --- | --- | --- | --- | --- |
| **Study example** | **EHR-continuity** | **Data** | **Number of patients** | **Number of events** | **Total person-years** |  | **Number of patients** | **Number of events** | **Total person-years** |
| **MA EHR system** | | | | | | | | | |
| PPI vs. H2RA and risk of pneumonia | Total cohort | EHR alone | 51099 | 2367 | 40487 |  | 14447 | 778 | 11312 |
| EHR-claims data | 51099 | 7908 | 37826 |  | 14447 | 2294 | 10580 |
| Excluding lower 25% | EHR alone | 37455 | 2091 | 29968 |  | 11742 | 743 | 9195 |
| EHR-claims data | 37455 | 5866 | 28104 |  | 11742 | 1945 | 8601 |
| Excluding lower 50% | EHR alone | 24461 | 1611 | 19933 |  | 8317 | 584 | 6633 |
| EHR-claims data | 24461 | 3587 | 18949 |  | 8317 | 1251 | 6305 |
| Excluding lower 75% | EHR alone | 11984 | 959 | 9896 |  | 4456 | 361 | 3593 |
| EHR-claims data | 11984 | 1684 | 9515 |  | 4456 | 636 | 3454 |
| PPI vs. non-PPI and risk of pneumonia | Total cohort | EHR alone | 51099 | 2367 | 40487 |  | 51330 | 891 | 44466 |
| EHR-claims data | 51099 | 7908 | 37826 |  | 51330 | 3642 | 43235 |
| Excluding lower 25% | EHR alone | 37735 | 2104 | 30179 |  | 39549 | 831 | 34216 |
| EHR-claims data | 37735 | 5923 | 28295 |  | 39549 | 2782 | 33339 |
| Excluding lower 50% | EHR alone | 27434 | 1747 | 22209 |  | 26266 | 695 | 22662 |
| EHR-claims data | 27434 | 4162 | 20994 |  | 26266 | 1767 | 22172 |
| Excluding lower 75% | EHR alone | 13338 | 1013 | 11027 |  | 12275 | 419 | 10706 |
| EHR-claims data | 13338 | 1822 | 10607 |  | 12275 | 721 | 10561 |
| Warfarin vs. DOACs and risk of bleeding | Total cohort | EHR alone | 10590 | 691 | 8563 |  | 1562 | 81 | 1104 |
| EHR-claims data | 10590 | 1242 | 8290 |  | 1562 | 141 | 1075 |
| Excluding lower 25% | EHR alone | 7923 | 559 | 6442 |  | 1208 | 69 | 848 |
| EHR-claims data | 7923 | 893 | 6274 |  | 1208 | 108 | 828 |
| Excluding lower 50% | EHR alone | 5406 | 422 | 4471 |  | 818 | 57 | 575 |
| EHR-claims data | 5406 | 593 | 4385 |  | 818 | 75 | 565 |
| Excluding lower 75% | EHR alone | 2688 | 229 | 2260 |  | 417 | 36 | 297 |
| EHR-claims data | 2688 | 301 | 2222 |  | 417 | 41 | 294 |
| All OAC vs. non-OAC and risk of bleeding | Total cohort | EHR alone | 12152 | 772 | 9667 |  | 44252 | 2238 | 34006 |
| EHR-claims data | 12152 | 1383 | 9365 |  | 44252 | 5088 | 32630 |
| Excluding lower 25% | EHR alone | 10325 | 687 | 8222 |  | 33092 | 1878 | 24946 |
| EHR-claims data | 10325 | 1170 | 7982 |  | 33092 | 3890 | 23978 |
| Excluding lower 50% | EHR alone | 8200 | 572 | 6593 |  | 20926 | 1235 | 16004 |
| EHR-claims data | 8200 | 878 | 6441 |  | 20926 | 2281 | 15505 |
| Excluding lower 75% | EHR alone | 4553 | 366 | 3711 |  | 9570 | 700 | 7317 |
| EHR-claims data | 4553 | 489 | 3646 |  | 9570 | 1001 | 7159 |
| **NC EHR system** | | | | | | | | | |
| PPI vs. H2RA and risk of pneumonia | Total cohort | EHR alone | 5620 | 439 | 3801 |  | 1421 | 119 | 899 |
| EHR-claims data | 5620 | 1062 | 3514 |  | 1421 | 333 | 814 |
| Excluding lower 25% | EHR alone | 4220 | 372 | 2887 |  | 1084 | 101 | 696 |
| EHR-claims data | 4220 | 748 | 2713 |  | 1084 | 252 | 640 |
| Excluding lower 50% | EHR alone | 2875 | 300 | 1958 |  | 725 | 79 | 466 |
| EHR-claims data | 2875 | 526 | 1854 |  | 725 | 155 | 438 |
| Excluding lower 75% | EHR alone | 1404 | 169 | 943 |  | 361 | 46 | 221 |
| EHR-claims data | 1404 | 258 | 903 |  | 361 | 83 | 207 |
| PPI vs. non-PPI and risk of pneumonia | Total cohort | EHR alone | 5620 | 439 | 3801 |  | 5694 | 101 | 4377 |
| EHR-claims data | 5620 | 1062 | 3514 |  | 5694 | 473 | 4216 |
| Excluding lower 25% | EHR alone | 4900 | 402 | 3306 |  | 3894 | 84 | 2937 |
| EHR-claims data | 4900 | 909 | 3079 |  | 3894 | 322 | 2836 |
| Excluding lower 50% | EHR alone | 3520 | 329 | 2429 |  | 2178 | 65 | 1635 |
| EHR-claims data | 3520 | 623 | 2294 |  | 2178 | 185 | 1592 |
| Excluding lower 75% | EHR alone | 2296 | 246 | 1570 |  | 1227 | 45 | 925 |
| EHR-claims data | 2296 | 410 | 1497 |  | 1227 | 110 | 899 |
| Warfarin vs. DOACs and risk of bleeding | Total cohort | EHR alone | 859 | 77 | 602 |  | 266 | 33 | 150 |
| EHR-claims data | 859 | 107 | 588 |  | 266 | 41 | 148 |
| Excluding lower 25% | EHR alone | 677 | 66 | 471 |  | 186 | 26 | 102 |
| EHR-claims data | 677 | 85 | 463 |  | 186 | 29 | 102 |
| Excluding lower 50% | EHR alone | 463 | 49 | 318 |  | 115 | 20 | 62 |
| EHR-claims data | 463 | 59 | 313 |  | 115 | 22 | 62 |
| Excluding lower 75% | EHR alone | 221 | 27 | 148 |  | 60 | 13 | 35 |
| EHR-claims data | 221 | 30 | 146 |  | 60 | 14 | 35 |
| All OAC vs. non-OAC and risk of bleeding | Total cohort | EHR alone | 1125 | 110 | 751 |  | 5103 | 340 | 3787 |
| EHR-claims data | 1125 | 148 | 736 |  | 5103 | 686 | 3621 |
| Excluding lower 25% | EHR alone | 1043 | 106 | 694 |  | 3728 | 296 | 2728 |
| EHR-claims data | 1043 | 137 | 681 |  | 3728 | 558 | 2604 |
| Excluding lower 50% | EHR alone | 874 | 93 | 584 |  | 2242 | 190 | 1642 |
| EHR-claims data | 874 | 117 | 575 |  | 2242 | 349 | 1567 |
| Excluding lower 75% | EHR alone | 587 | 69 | 388 |  | 988 | 109 | 710 |
| EHR-claims data | 587 | 81 | 383 |  | 988 | 158 | 685 |

Abbreviations: CI = confidence interval; DOAC = direct-acting oral anticoagulant; EHR = electronic health records; H2RA = H2 receptor antagonists; OAC = oral anticoagulant; PPI = proton pump inhibitors.

**Table S6. Metrics for crude and adjusted incidence rate difference and by level of EHR-continuity: NC EHR system**

| **Medication/**  **outcome** | **Level of**  **EHR-continuity** | **Crude IRD** | | | |  | **Adjusted* IRD** | | | |
| --- | --- | --- | --- | --- | --- | --- | --- | --- | --- | --- |
| **IRDEHR**  **(95% CI)** | **IRDEHR+claims**  **(95% CI)** | **Bias** | **95% CI**  **overlap** |  | **IRDEHR**  **(95% CI)** | **IRDEHR+claims**  **(95% CI)** | **Bias** | **95% CI overlap** |
| PPI vs. H2RA and risk of pneumonia | Total cohort | -1.68 (-4.12, 0.76) | -10.69 (-14.39, -6.99) | 9.5% | 0.0% |  | 0.44 (-1.20, 2.08) | -5.09 (-8.38, -1.79) | 7.0% | 0.0% |
| Excluding lower 25% | -1.62 (-4.51, 1.27) | -11.82 (-15.96, -7.67) | 10.9% | 0.0% |  | 1.22 (-0.67, 3.10) | -5.05 (-8.56, -1.55) | 8.5% | 0.0% |
| Excluding lower 50% | -1.62 (-5.38, 2.14) | -7.03 (-11.96, -2.11) | 5.7% | 23.2% |  | 1.81 (-0.70, 4.33) | -1.06 (-5.07, 2.95) | 4.0% | 38.9% |
| Excluding lower 75% | -2.86 (-8.74, 3.02) | -11.50 (-18.80, -4.20) | 8.6% | 20.8% |  | 2.53 (-1.32, 6.37) | -4.81 (-11.00, 1.38) | 9.4% | 15.5% |
| PPI vs. non-PPI users and risk of pneumonia | Total cohort | 9.24 (8.13, 10.35) | 19.00 (17.21, 20.79) | 17.1% | 0.0% |  | 1.97 (1.23, 2.72) | 6.58 (5.11, 8.05) | 10.3% | 0.0% |
| Excluding lower 25% | 9.30 (8.03, 10.57) | 18.17 (16.18, 20.16) | 15.7% | 0.0% |  | 2.27 (1.35, 3.20) | 6.16 (4.47, 7.85) | 8.4% | 0.0% |
| Excluding lower 50% | 9.57 (7.91, 11.22) | 15.54 (13.13, 17.94) | 10.6% | 0.0% |  | 3.20 (1.91, 4.50) | 5.99 (3.91, 8.07) | 5.9% | 9.5% |
| Excluding lower 75% | 10.81 (8.54, 13.08) | 15.14 (12.02, 18.25) | 7.4% | 10.8% |  | 3.58 (1.81, 5.34) | 6.17 (3.46, 8.88) | 5.3% | 26.6% |
| Warfarin vs. DOACs and risk of bleeding | Total cohort | -9.28 (-16.43, -2.12) | -9.56 (-17.42, -1.71) | 0.3% | 91.0% |  | -11.34 (-18.36, -4.32) | -12.55 (-20.48, -4.63) | 1.3% | 84.9% |
| Excluding lower 25% | -11.36 (-20.37, -2.35) | -10.01 (-19.45, -0.58) | 1.4% | 86.3% |  | -14.35 (-23.42, -5.29) | -11.09 (-20.37, -1.81) | 3.4% | 69.8% |
| Excluding lower 50% | -16.81 (-29.09, -4.52) | -16.71 (-29.39, -4.03) | 0.1% | 96.9% |  | -28.24 (-44.19, -12.29) | -23.84 (-39.23, -8.46) | 3.2% | 75.4% |
| Excluding lower 75% | -18.90 (-36.07, -1.72) | -19.74 (-37.25, -2.22) | 0.8% | 95.3% |  | -23.91 (-45.84, -1.98) | -18.89 (-37.43, -0.35) | 4.1% | 77.9% |
| All OAC vs. non-OAC and risk of bleeding | Total cohort | 5.66 (2.98, 8.35) | 1.17 (-2.00, 4.33) | 5.4% | 13.1% |  | 4.34 (1.33, 7.35) | 0.80 (-2.83, 4.42) | 3.7% | 30.3% |
| Excluding lower 25% | 4.43 (1.51, 7.35) | -1.32 (-4.72, 2.08) | 7.3% | 4.8% |  | 5.87 (2.16, 9.59) | 0.52 (-3.67, 4.71) | 5.4% | 19.3% |
| Excluding lower 50% | 4.36 (1.01, 7.71) | -1.93 (-5.81, 1.96) | 8.6% | 7.0% |  | 10.19 (5.31, 15.07) | 6.41 (0.76, 12.05) | 3.6% | 47.1% |
| Excluding lower 75% | 2.41 (-2.23, 7.05) | -1.91 (-7.07, 3.26) | 6.1% | 38.9% |  | 13.63 (6.85, 20.41) | 7.42 (-0.25, 15.09) | 6.0% | 39.9% |

Abbreviations: CI = confidence interval; DOAC = direct-acting oral anticoagulant; EHR = electronic health records; H2RA = H2 receptor antagonists; IRD = incidence rate difference; OAC = oral anticoagulant; PPI = proton pump inhibitors.

*Adjusted by propensity score decile.

**Table S7. Metrics for crude and adjusted hazard ratio by level of EHR-continuity: NC EHR system**

| **Medication/**  **outcome** | **Level of**  **EHR-continuity** | **Crude HR** | | | |  | **Adjusted* HR** | | | |
| --- | --- | --- | --- | --- | --- | --- | --- | --- | --- | --- |
| **HREHR**  **(95% CI)** | **HREHR+claims**  **(95% CI)** | **Bias** | **95% CI**  **overlap** |  | **Adjusted***  **HREHR**  **(95% CI)** | **Adjusted HREHR+claims**  **(95% CI)** | **Bias** | **95% CI overlap** |
| PPI vs. H2RA and risk of pneumonia | Total cohort | 0.88 (0.74, 1.06) | 0.75 (0.67, 0.85) | 17.3% | 28.4% |  | 1.06 (0.88, 1.27) | 0.87 (0.78, 0.98) | 21.1% | 20.4% |
| Excluding lower 25% | 0.90 (0.74, 1.10) | 0.71 (0.62, 0.82) | 26.2% | 16.4% |  | 1.13 (0.92, 1.37) | 0.85 (0.75, 0.98) | 31.7% | 8.7% |
| Excluding lower 50% | 0.92 (0.73, 1.15) | 0.81 (0.69, 0.96) | 12.6% | 50.0% |  | 1.15 (0.92, 1.44) | 0.97 (0.82, 1.14) | 18.4% | 36.8% |
| Excluding lower 75% | 0.88 (0.65, 1.18) | 0.74 (0.59, 0.93) | 19.1% | 46.0% |  | 1.18 (0.87, 1.58) | 0.88 (0.70, 1.10) | 33.5% | 26.3% |
| PPI vs. non-PPI users and risk of pneumonia | Total cohort | 4.86 (3.93, 6.02) | 2.58 (2.32, 2.87) | 88.5% | 0.0% |  | 1.63 (1.28, 2.07) | 1.47 (1.31, 1.65) | 10.6% | 43.1% |
| Excluding lower 25% | 4.15 (3.29, 5.24) | 2.50 (2.21, 2.84) | 65.7% | 0.0% |  | 1.58 (1.22, 2.04) | 1.43 (1.25, 1.63) | 10.4% | 47.0% |
| Excluding lower 50% | 3.35 (2.58, 4.35) | 2.28 (1.93, 2.68) | 47.2% | 4.2% |  | 1.64 (1.24, 2.16) | 1.42 (1.20, 1.68) | 15.5% | 45.6% |
| Excluding lower 75% | 3.16 (2.32, 4.29) | 2.18 (1.77, 2.67) | 45.0% | 13.9% |  | 1.58 (1.15, 2.19) | 1.41 (1.14, 1.74) | 12.7% | 56.2% |
| Warfarin vs. DOACs and risk of bleeding | Total cohort | 0.62 (0.41, 0.95) | 0.69 (0.48, 1.00) | 11.4% | 78.8% |  | 0.53 (0.34, 0.84) | 0.59 (0.39, 0.88) | 10.1% | 82.8% |
| Excluding lower 25% | 0.59 (0.37, 0.94) | 0.68 (0.44, 1.05) | 15.5% | 73.6% |  | 0.49 (0.30, 0.82) | 0.63 (0.39, 1.01) | 26.5% | 60.8% |
| Excluding lower 50% | 0.51 (0.29, 0.88) | 0.55 (0.33, 0.93) | 9.2% | 86.4% |  | 0.34 (0.18, 0.63) | 0.43 (0.23, 0.79) | 26.9% | 65.1% |
| Excluding lower 75% | 0.50 (0.24, 1.03) | 0.52 (0.26, 1.02) | 2.9% | 96.3% |  | 0.44 (0.19, 1.00) | 0.53 (0.26, 1.08) | 20.5% | 83.1% |
| All OAC vs. non-OAC and risk of bleeding | Total cohort | 1.57 (1.24, 1.99) | 1.03 (0.85, 1.25) | 51.8% | 1.0% |  | 1.45 (1.03, 2.06) | 1.05 (0.83, 1.34) | 38.2% | 25.3% |
| Excluding lower 25% | 1.42 (1.11, 1.81) | 0.93 (0.76, 1.14) | 52.4% | 2.1% |  | 1.51 (1.04, 2.18) | 1.06 (0.81, 1.38) | 42.6% | 24.3% |
| Excluding lower 50% | 1.34 (1.02, 1.76) | 0.83 (0.67, 1.04) | 60.4% | 2.2% |  | 2.02 (1.31, 3.11) | 1.31 (0.94, 1.83) | 54.0% | 23.8% |
| Excluding lower 75% | 1.32 (0.91, 1.93) | 0.93 (0.68, 1.27) | 42.8% | 28.7% |  | 2.37 (1.31, 4.26) | 1.59 (0.86, 2.94) | 49.1% | 47.7% |

Abbreviations: CI = confidence interval; DOAC = direct-acting oral anticoagulant; EHR = electronic health records; H2RA = H2 receptor antagonists; IRD = incidence rate difference; OAC = oral anticoagulant; PPI = proton pump inhibitors.

*Adjusted by propensity score decile.

**Table S8. Incidence rates and percentage of underestimated incidence rates* by exposure group: 180-day maximum follow-up**

| Study example | EHR-continuity | Data | Number of event/(rate per 100 PY), exposure | Number of event/(rate per 100 PY), reference | % underestimation, exposure | % underestimation, reference |
| --- | --- | --- | --- | --- | --- | --- |
| MA EHR system | | | | | | |
| PPI vs. H2RA and risk of pneumonia | Total cohort | EHR alone | 2290 (10.32) | 753 (12.11) | 71% | 67% |
| EHR-claims data | 7549 (35.87) | 2190 (37.16) |
| Excluding lower 25% | EHR alone | 2023 (12.41) | 719 (14.25) | 66% | 63% |
| EHR-claims data | 5593 (36.10) | 1852 (38.79) |
| Excluding lower 50% | EHR alone | 1553 (14.41) | 565 (15.62) | 56% | 54% |
| EHR-claims data | 3411 (32.97) | 1187 (34.21) |
| Excluding lower 75% | EHR alone | 920 (17.30) | 344 (17.62) | 44% | 44% |
| EHR-claims data | 1596 (31.00) | 599 (31.74) |
| PPI vs. non-PPI and risk of pneumonia | Total cohort | EHR alone | 2290 (10.32) | 863 (3.63) | 71% | 76% |
| EHR-claims data | 7549 (35.87) | 3480 (14.91) |
| Excluding lower 25% | EHR alone | 2036 (12.40) | 804 (4.40) | 66% | 70% |
| EHR-claims data | 5648 (36.19) | 2658 (14.77) |
| Excluding lower 50% | EHR alone | 1688 (14.02) | 669 (5.52) | 59% | 61% |
| EHR-claims data | 3960 (34.42) | 1679 (14.04) |
| Excluding lower 75% | EHR alone | 972 (16.42) | 401 (7.03) | 45% | 42% |
| EHR-claims data | 1724 (30.06) | 682 (12.06) |
| Warfarin vs. DOACs and risk of bleeding | Total cohort | EHR alone | 624 (13.42) | 71 (10.92) | 43% | 43% |
| EHR-claims data | 1064 (23.40) | 121 (18.99) |
| Excluding lower 25% | EHR alone | 500 (14.29) | 60 (12.01) | 36% | 37% |
| EHR-claims data | 762 (22.18) | 93 (18.93) |
| Excluding lower 50% | EHR alone | 371 (15.40) | 49 (14.49) | 28% | 26% |
| EHR-claims data | 507 (21.33) | 65 (19.46) |
| Excluding lower 75% | EHR alone | 201 (16.61) | 32 (18.31) | 24% | 14% |
| EHR-claims data | 262 (21.92) | 37 (21.30) |
| All OAC vs. non-OAC and risk of bleeding | Total cohort | EHR alone | 695 (13.11) | 2128 (11.44) | 43% | 55% |
| EHR-claims data | 1185 (22.85) | 4547 (25.16) |
| Excluding lower 25% | EHR alone | 615 (13.65) | 1776 (12.94) | 40% | 50% |
| EHR-claims data | 1000 (22.65) | 3475 (26.02) |
| Excluding lower 50% | EHR alone | 507 (14.07) | 1148 (13.02) | 33% | 44% |
| EHR-claims data | 746 (21.03) | 2021 (23.43) |
| Excluding lower 75% | EHR alone | 321 (15.91) | 657 (16.28) | 25% | 27% |
| EHR-claims data | 421 (21.12) | 891 (22.42) |
| NC EHR system | | | | | | |
| PPI vs. H2RA and risk of pneumonia | Total cohort | EHR alone | 408 (18.36) | 113 (21.30) | 66% | 63% |
| EHR-claims data | 1006 (48.41) | 322 (66.88) |
| Excluding lower 25% | EHR alone | 342 (20.33) | 96 (23.35) | 56% | 54% |
| EHR-claims data | 700 (43.91) | 245 (64.98) |
| Excluding lower 50% | EHR alone | 272 (23.83) | 74 (26.87) | 44% | 44% |
| EHR-claims data | 485 (44.55) | 148 (57.26) |
| Excluding lower 75% | EHR alone | 148 (26.70) | 41 (31.00) | 71% | 67% |
| EHR-claims data | 232 (43.57) | 77 (62.19) |
| PPI vs. non-PPI and risk of pneumonia | Total cohort | EHR alone | 408 (18.36) | 92 (3.70) | 66% | 70% |
| EHR-claims data | 1006 (48.41) | 450 (18.53) |
| Excluding lower 25% | EHR alone | 372 (19.23) | 76 (4.52) | 59% | 61% |
| EHR-claims data | 857 (47.12) | 309 (18.75) |
| Excluding lower 50% | EHR alone | 301 (21.35) | 60 (6.38) | 45% | 42% |
| EHR-claims data | 579 (43.15) | 179 (19.36) |
| Excluding lower 75% | EHR alone | 219 (23.95) | 42 (7.91) | 71% | 76% |
| EHR-claims data | 371 (42.29) | 107 (20.49) |
| Warfarin vs. DOACs and risk of bleeding | Total cohort | EHR alone | 64 (18.29) | 32 (34.04) | 40% | 50% |
| EHR-claims data | 88 (25.48) | 39 (41.79) |
| Excluding lower 25% | EHR alone | 55 (19.91) | 25 (38.34) | 33% | 44% |
| EHR-claims data | 70 (25.57) | 27 (41.45) |
| Excluding lower 50% | EHR alone | 40 (21.30) | 19 (47.52) | 25% | 27% |
| EHR-claims data | 47 (25.19) | 20 (50.03) |
| Excluding lower 75% | EHR alone | 23 (26.13) | 12 (55.24) | 43% | 55% |
| EHR-claims data | 24 (27.31) | 12 (55.24) |
| All OAC vs. non-OAC and risk of bleeding | Total cohort | EHR alone | 96 (21.62) | 282 (13.42) | 36% | 37% |
| EHR-claims data | 127 (28.95) | 604 (29.70) |
| Excluding lower 25% | EHR alone | 92 (22.37) | 243 (15.97) | 28% | 26% |
| EHR-claims data | 117 (28.73) | 486 (33.04) |
| Excluding lower 50% | EHR alone | 80 (23.07) | 157 (17.13) | 24% | 14% |
| EHR-claims data | 98 (28.46) | 301 (33.96) |
| Excluding lower 75% | EHR alone | 59 (25.41) | 82 (20.63) | 43% | 43% |
| EHR-claims data | 67 (29.01) | 128 (33.04) |

DOAC = direct-acting oral anticoagulant; EHR = electronic health records; H2RA = H2 receptor antagonists; IRD = incidence rate difference; OAC = oral anticoagulant; PPI = proton pump inhibitors; PY = person-year.

*Underestimation of incidence rates was calculated as difference in the incidence rate from EHR+claims data and EHR only, divided by the incidence rate from EHR+claims data: ((IREHR+claims – IREHR)/IREHR+claims).

**Table S9. Metrics for crude and adjusted incidence rate difference by level of EHR-continuity: 180-day maximum follow-up**

| **Medication/**  **outcome** | **Level of**  **EHR-continuity** | **Crude IRD** | | | |  | **Adjusted* IRD** | | | |
| --- | --- | --- | --- | --- | --- | --- | --- | --- | --- | --- |
| **IRDEHR**  **(95% CI)** | **IRDEHR+claims**  **(95% CI)** | **Bias** | **95% CI**  **overlap** |  | **IRDEHR**  **(95% CI)** | **IRDEHR+claims**  **(95% CI)** | **Bias** | **95% CI overlap** |
| **MA EHR system** | | | | | | | | | | |
| PPI vs. H2RA and risk of pneumonia | Total cohort | -1.78 (-2.69, -0.88) | -1.29 (-2.69, 0.10) | 0.5% | 65% |  | -0.36 (-1.62, 0.91) | 0.01 (-0.60, 0.61) | 0.4% | 48% |
| Excluding lower 25% | -1.85 (-2.93, -0.76) | -2.69 (-4.27, -1.12) | 0.8% | 52% |  | -0.88 (-2.30, 0.55) | -0.11 (-0.88, 0.66) | 1.0% | 48% |
| Excluding lower 50% | -1.20 (-2.56, 0.15) | -1.25 (-3.07, 0.57) | 0.0% | 75% |  | 0.59 (-0.99, 2.17) | 0.35 (-0.63, 1.34) | 0.3% | 62% |
| Excluding lower 75% | -0.32 (-2.29, 1.66) | -0.74 (-3.19, 1.71) | 0.4% | 80% |  | 0.73 (-1.37, 2.82) | 0.97 (-0.53, 2.47) | 0.4% | 71% |
| PPI vs. non-PPI users and risk of pneumonia | Total cohort | 6.69 (6.22, 7.15) | 20.96 (20.17, 21.75) | 19.0% | 0% |  | 7.45 (6.80, 8.09) | 2.63 (2.26, 3.00) | 9.2% | 0% |
| Excluding lower 25% | 8.00 (7.41, 8.58) | 21.42 (20.51, 22.34) | 17.4% | 0% |  | 7.54 (6.79, 8.28) | 2.41 (1.97, 2.85) | 9.7% | 0% |
| Excluding lower 50% | 8.51 (7.76, 9.25) | 20.38 (19.32, 21.45) | 15.5% | 0% |  | 7.64 (6.77, 8.51) | 2.63 (2.07, 3.20) | 9.8% | 0% |
| Excluding lower 75% | 9.39 (8.23, 10.54) | 18.00 (16.54, 19.45) | 11.3% | 0% |  | 6.73 (5.57, 7.90) | 2.96 (2.09, 3.83) | 7.9% | 0% |
| Warfarin vs. DOACs and risk of bleeding | Total cohort | 2.51 (-0.08, 5.10) | 4.41 (1.12, 7.69) | 1.6% | 51% |  | 2.08 (-1.14, 5.31) | -0.02 (-2.55, 2.51) | 2.3% | 46% |
| Excluding lower 25% | 2.29 (-0.79, 5.37) | 3.25 (-0.48, 6.99) | 0.8% | 75% |  | -0.02 (-3.75, 3.71) | -0.41 (-3.41, 2.60) | 0.4% | 81% |
| Excluding lower 50% | 0.91 (-3.11, 4.93) | 1.87 (-2.68, 6.42) | 0.8% | 80% |  | -0.92 (-5.34, 3.50) | -1.86 (-5.71, 1.99) | 1.1% | 80% |
| Excluding lower 75% | -1.69 (-7.80, 4.41) | 0.62 (-5.90, 7.14) | 1.8% | 69% |  | -1.94 (-8.33, 4.45) | -4.48 (-10.61, 1.66) | 2.8% | 66% |
| All OAC vs. non-OAC and risk of bleeding | Total cohort | 1.67 (0.65, 2.69) | -2.31 (-3.61, -1.00) | 4.0% | 0% |  | 2.13 (0.35, 3.91) | 2.02 (0.63, 3.41) | 0.1% | 78% |
| Excluding lower 25% | 0.71 (-0.44, 1.86) | -3.37 (-4.81, -1.93) | 4.2% | 0% |  | 2.18 (0.16, 4.21) | 2.33 (0.78, 3.88) | 0.1% | 77% |
| Excluding lower 50% | 1.05 (-0.29, 2.38) | -2.41 (-4.02, -0.80) | 3.8% | 0% |  | 3.21 (0.96, 5.47) | 3.75 (1.95, 5.55) | 0.5% | 77% |
| Excluding lower 75% | -0.36 (-2.33, 1.60) | -1.30 (-3.52, 0.91) | 1.0% | 63% |  | 4.65 (1.58, 7.72) | 3.47 (0.77, 6.16) | 1.3% | 66% |
| **NC EHR system** | | | | | | | | | | |
| PPI vs. H2RA and risk of pneumonia | Total cohort | -2.94 (-6.78, 0.89) | -18.47 (-23.19, -13.75) | 11.9% | 0% |  | -8.88 (-14.15, -3.62) | 0.53 (-2.14, 3.20) | 8.4% | 0% |
| Excluding lower 25% | -3.02 (-7.54, 1.50) | -21.07 (-26.46, -15.67) | 13.8% | 0% |  | -9.66 (-15.31, -4.01) | 1.67 (-1.39, 4.73) | 10.8% | 0% |
| Excluding lower 50% | -3.04 (-8.84, 2.75) | -12.71 (-19.43, -5.99) | 7.1% | 13% |  | -2.71 (-9.09, 3.66) | 2.41 (-1.65, 6.47) | 5.2% | 34% |
| Excluding lower 75% | -4.30 (-13.01, 4.40) | -18.62 (-28.14, -9.10) | 10.4% | 12% |  | -8.47 (-18.26, 1.31) | 3.88 (-2.13, 9.88) | 11.8% | 12% |
| PPI vs. non-PPI users and risk of pneumonia | Total cohort | 14.66 (12.89, 16.43) | 29.88 (27.23, 32.52) | 17.6% | 0% |  | 10.27 (7.88, 12.65) | 3.16 (1.93, 4.39) | 11.0% | 0% |
| Excluding lower 25% | 14.72 (12.70, 16.73) | 28.36 (25.40, 31.33) | 15.9% | 0% |  | 9.33 (6.60, 12.06) | 3.57 (2.05, 5.10) | 8.8% | 0% |
| Excluding lower 50% | 14.96 (12.31, 17.61) | 23.80 (20.12, 27.47) | 10.1% | 0% |  | 8.88 (5.49, 12.27) | 4.97 (2.83, 7.10) | 6.0% | 17% |
| Excluding lower 75% | 16.05 (12.45, 19.64) | 21.80 (17.04, 26.56) | 6.4% | 18% |  | 8.16 (3.76, 12.55) | 4.85 (1.98, 7.72) | 5.0% | 37% |
| Warfarin vs. DOACs and risk of bleeding | Total cohort | -15.75 (-26.15, -5.35) | -16.31 (-27.34, -5.28) | 0.4% | 94% |  | -22.24 (-34.49, -10.00) | -19.33 (-30.06, -8.61) | 2.8% | 77% |
| Excluding lower 25% | -18.43 (-31.15, -5.70) | -15.89 (-28.93, -2.85) | 1.9% | 82% |  | -19.75 (-34.26, -5.24) | -24.92 (-38.95, -10.88) | 4.8% | 69% |
| Excluding lower 50% | -26.22 (-42.77, -9.68) | -24.84 (-41.54, -8.14) | 1.0% | 92% |  | -38.10 (-61.46, -14.73) | -40.00 (-62.75, -17.26) | 1.3% | 92% |
| Excluding lower 75% | -29.11 (-51.82, -6.39) | -27.93 (-50.70, -5.16) | 0.9% | 95% |  | -22.74 (-49.60, 4.13) | -27.09 (-56.53, 2.34) | 3.8% | 86% |
| All OAC vs. non-OAC and risk of bleeding | Total cohort | 8.20 (4.10, 12.30) | -0.76 (-5.44, 3.93) | 7.1% | 0% |  | -0.34 (-5.87, 5.19) | 8.70 (3.75, 13.64) | 8.1% | 7% |
| Excluding lower 25% | 6.39 (1.97, 10.82) | -4.31 (-9.32, 0.70) | 9.1% | 0% |  | -1.08 (-7.40, 5.23) | 10.92 (4.97, 16.87) | 10.8% | 1% |
| Excluding lower 50% | 5.93 (0.87, 10.99) | -5.50 (-11.20, 0.20) | 10.5% | 0% |  | 4.72 (-3.51, 12.95) | 14.50 (7.01, 21.99) | 8.3% | 23% |
| Excluding lower 75% | 4.78 (-2.09, 11.65) | -4.03 (-11.53, 3.47) | 8.6% | 24% |  | 7.51 (-3.91, 18.93) | 22.44 (11.83, 33.04) | 12.9% | 19% |

Abbreviations: CI = confidence interval; DOAC = direct-acting oral anticoagulant; EHR = electronic health records; H2RA = H2 receptor antagonists; IRD = incidence rate difference; OAC = oral anticoagulant; PPI = proton pump inhibitors.

*Adjusted by propensity score decile.

**Table S10. Metrics for crude and adjusted hazard ratio by level of EHR-continuity: 180-day maximum follow-up**

| **Medication/**  **outcome** | **Level of**  **EHR-continuity** | **Crude** | | | |  | **Adjusted*** | | | |
| --- | --- | --- | --- | --- | --- | --- | --- | --- | --- | --- |
| **HREHR**  **(95% CI)** | **HREHR+claims**  **(95% CI)** | **Bias** | **95% CI**  **overlap** |  | **Adjusted***  **HREHR**  **(95% CI)** | **Adjusted HREHR+claims**  **(95% CI)** | **Bias** | **95% CI overlap** |
| **MA EHR system** | | | | | | | | | | |
| PPI vs. H2RA and risk of pneumonia | Total cohort | 0.97 (0.92, 1.01) | 0.85 (0.79, 0.92) | 13.73% | 0% |  | 0.99 (0.95, 1.03) | 1.00 (0.93, 1.08) | 1.07% | 58% |
| Excluding lower 25% | 0.93 (0.89, 0.98) | 0.87 (0.81, 0.94) | 6.86% | 30% |  | 0.98 (0.93, 1.02) | 0.99 (0.92, 1.07) | 1.10% | 61% |
| Excluding lower 50% | 0.96 (0.91, 1.02) | 0.92 (0.84, 1.01) | 4.10% | 56% |  | 1.02 (0.96, 1.08) | 1.02 (0.94, 1.12) | 0.49% | 68% |
| Excluding lower 75% | 0.98 (0.90, 1.06) | 0.98 (0.87, 1.10) | 0.02% | 75% |  | 1.02 (0.94, 1.12) | 1.06 (0.94, 1.19) | 3.73% | 69% |
| PPI vs. non-PPI users and risk of pneumonia | Total cohort | 2.40 (2.30, 2.50) | 2.85 (2.64, 3.08) | 18.82% | 0% |  | 1.46 (1.40, 1.53) | 1.59 (1.45, 1.74) | 8.87% | 23% |
| Excluding lower 25% | 2.44 (2.33, 2.55) | 2.82 (2.60, 3.06) | 15.70% | 0% |  | 1.47 (1.40, 1.54) | 1.45 (1.33, 1.59) | 1.09% | 54% |
| Excluding lower 50% | 2.44 (2.30, 2.58) | 2.55 (2.33, 2.78) | 4.31% | 53% |  | 1.50 (1.41, 1.59) | 1.41 (1.28, 1.55) | 6.64% | 44% |
| Excluding lower 75% | 2.48 (2.27, 2.71) | 2.34 (2.08, 2.62) | 6.16% | 56% |  | 1.51 (1.38, 1.66) | 1.37 (1.22, 1.55) | 10.18% | 37% |
| Warfarin vs. DOACs and risk of bleeding | Total cohort | 1.23 (1.00, 1.51) | 1.23 (0.94, 1.60) | 0.37% | 77% |  | 1.10 (0.88, 1.36) | 1.00 (0.75, 1.32) | 10.33% | 71% |
| Excluding lower 25% | 1.17 (0.93, 1.47) | 1.19 (0.89, 1.59) | 1.49% | 77% |  | 1.00 (0.78, 1.28) | 0.97 (0.72, 1.32) | 2.92% | 83% |
| Excluding lower 50% | 1.09 (0.83, 1.43) | 1.06 (0.77, 1.45) | 2.99% | 89% |  | 0.96 (0.72, 1.28) | 0.89 (0.64, 1.24) | 8.01% | 81% |
| Excluding lower 75% | 1.02 (0.71, 1.48) | 0.90 (0.60, 1.35) | 13.10% | 73% |  | 0.92 (0.62, 1.35) | 0.78 (0.51, 1.21) | 17.63% | 69% |
| All OAC vs. non-OAC and risk of bleeding | Total cohort | 0.97 (0.89, 1.06) | 1.26 (1.12, 1.41) | 29.91% | 0% |  | 1.13 (1.03, 1.24) | 1.26 (1.09, 1.45) | 11.24% | 35% |
| Excluding lower 25% | 0.94 (0.86, 1.03) | 1.14 (1.01, 1.29) | 21.60% | 3% |  | 1.13 (1.02, 1.25) | 1.22 (1.06, 1.41) | 8.01% | 50% |
| Excluding lower 50% | 1.00 (0.90, 1.12) | 1.27 (1.11, 1.46) | 27.19% | 2% |  | 1.22 (1.08, 1.39) | 1.46 (1.24, 1.73) | 20.02% | 23% |
| Excluding lower 75% | 1.09 (0.93, 1.28) | 1.15 (0.95, 1.38) | 5.38% | 73% |  | 1.37 (1.14, 1.66) | 1.50 (1.20, 1.87) | 9.27% | 63% |
| **NC EHR system** | | | | | | | | | | |
| PPI vs. H2RA and risk of pneumonia | Total cohort | 0.74 (0.66, 0.83) | 0.87 (0.72, 1.05) | 17.28% | 29% |  | 0.86 (0.77, 0.97) | 1.04 (0.86, 1.25) | 20.44% | 23% |
| Excluding lower 25% | 0.69 (0.60, 0.79) | 0.88 (0.71, 1.08) | 26.95% | 16% |  | 0.83 (0.72, 0.95) | 1.10 (0.89, 1.35) | 32.27% | 9% |
| Excluding lower 50% | 0.79 (0.66, 0.93) | 0.89 (0.71, 1.13) | 12.83% | 50% |  | 0.95 (0.80, 1.12) | 1.12 (0.88, 1.42) | 17.83% | 39% |
| Excluding lower 75% | 0.72 (0.57, 0.91) | 0.87 (0.63, 1.19) | 20.71% | 45% |  | 0.85 (0.67, 1.08) | 1.17 (0.85, 1.62) | 37.92% | 25% |
| PPI vs. non-PPI users and risk of pneumonia | Total cohort | 2.56 (2.29, 2.86) | 4.93 (3.94, 6.17) | 92.59% | 0% |  | 1.46 (1.30, 1.64) | 1.65 (1.28, 2.12) | 12.79% | 41% |
| Excluding lower 25% | 2.45 (2.16, 2.79) | 4.23 (3.31, 5.40) | 72.54% | 0% |  | 1.40 (1.22, 1.60) | 1.59 (1.21, 2.09) | 13.85% | 44% |
| Excluding lower 50% | 2.19 (1.85, 2.58) | 3.32 (2.53, 4.36) | 51.50% | 2% |  | 1.37 (1.16, 1.63) | 1.63 (1.22, 2.17) | 18.76% | 41% |
| Excluding lower 75% | 2.03 (1.65, 2.50) | 3.01 (2.19, 4.13) | 48.05% | 12% |  | 1.33 (1.07, 1.64) | 1.51 (1.08, 2.10) | 13.23% | 55% |
| Warfarin vs. DOACs and risk of bleeding | Total cohort | 0.62 (0.42, 0.92) | 0.55 (0.35, 0.85) | 12.81% | 78% |  | 0.53 (0.34, 0.81) | 0.49 (0.31, 0.77) | 9.13% | 85% |
| Excluding lower 25% | 0.62 (0.39, 0.99) | 0.53 (0.32, 0.86) | 17.66% | 71% |  | 0.56 (0.33, 0.95) | 0.44 (0.26, 0.73) | 28.56% | 58% |
| Excluding lower 50% | 0.50 (0.29, 0.88) | 0.45 (0.25, 0.80) | 11.03% | 82% |  | 0.38 (0.20, 0.73) | 0.33 (0.17, 0.62) | 16.22% | 77% |
| Excluding lower 75% | 0.50 (0.24, 1.04) | 0.48 (0.23, 1.00) | 5.26% | 93% |  | 0.55 (0.25, 1.22) | 0.50 (0.21, 1.16) | 10.72% | 91% |
| All OAC vs. non-OAC and risk of bleeding | Total cohort | 1.02 (0.84, 1.25) | 1.69 (1.33, 2.16) | 66.07% | 0% |  | 1.02 (0.79, 1.30) | 1.71 (1.19, 2.46) | 67.48% | 7% |
| Excluding lower 25% | 0.92 (0.75, 1.14) | 1.54 (1.19, 1.97) | 66.94% | 0% |  | 1.01 (0.77, 1.33) | 1.79 (1.22, 2.61) | 77.00% | 6% |
| Excluding lower 50% | 0.84 (0.67, 1.06) | 1.45 (1.09, 1.93) | 72.88% | 0% |  | 1.16 (0.82, 1.63) | 2.14 (1.37, 3.35) | 84.22% | 11% |
| Excluding lower 75% | 1.11 (0.79, 1.56) | 1.82 (1.19, 2.80) | 64.31% | 19% |  | 1.78 (0.89, 3.55) | 4.36 (2.16, 8.83) | 145.07% | 18% |

Abbreviations: CI = confidence interval; DOAC = direct-acting oral anticoagulant; EHR = electronic health records; H2RA = H2 receptor antagonists; OAC = oral anticoagulant; PPI = proton pump inhibitors.

*Adjusted by propensity score decile.

**Table S11. Metrics for crude and adjusted incidence rate difference by level of EHR-continuity: inverse probability weighting analysis**

| **Medication/**  **outcome** | **Level of**  **EHR-continuity** | **Crude IRD** | | | |  | **Weighted* IRD** | | | |
| --- | --- | --- | --- | --- | --- | --- | --- | --- | --- | --- |
| **IRDEHR**  **(95% CI)** | **IRDEHR+claims**  **(95% CI)** | **Bias** | **95% CI**  **overlap** |  | **IRDEHR**  **(95% CI)** | **IRDEHR+claims**  **(95% CI)** | **Bias** | **95% CI overlap** |
| **MA EHR system** | | | | | | | | | | |
| PPI vs. H2RA and risk of pneumonia | Total cohort | -1.78 (-2.69, -0.88) | -1.29 (-2.69, 0.10) | 0.5% | 65% |  | 0.19 (-0.56, 0.95) | 0.27 (-0.09, 0.63) | 0.4% | 48% |
| Excluding lower 25% | -1.85 (-2.93, -0.76) | -2.69 (-4.27, -1.12) | 0.8% | 52% |  | -0.06 (-0.91, 0.79) | 0.16 (-0.29, 0.61) | 1.0% | 48% |
| Excluding lower 50% | -1.20 (-2.56, 0.15) | -1.25 (-3.07, 0.57) | 0.0% | 75% |  | 0.74 (-0.19, 1.67) | 0.47 (-0.10, 1.05) | 0.3% | 62% |
| Excluding lower 75% | -0.32 (-2.29, 1.66) | -0.74 (-3.19, 1.71) | 0.4% | 80% |  | 0.83 (-0.40, 2.06) | 0.67 (-0.20, 1.53) | 0.4% | 71% |
| PPI vs. non-PPI users and risk of pneumonia | Total cohort | 6.69 (6.22, 7.15) | 20.96 (20.17, 21.75) | 19.0% | 0% |  | 5.04 (4.61, 5.46) | 1.67 (1.42, 1.92) | 9.2% | 0% |
| Excluding lower 25% | 8.00 (7.41, 8.58) | 21.42 (20.51, 22.34) | 17.4% | 0% |  | 4.99 (4.50, 5.48) | 1.97 (1.65, 2.28) | 9.7% | 0% |
| Excluding lower 50% | 8.51 (7.76, 9.25) | 20.38 (19.32, 21.45) | 15.5% | 0% |  | 5.05 (4.47, 5.62) | 2.00 (1.62, 2.37) | 9.8% | 0% |
| Excluding lower 75% | 9.39 (8.23, 10.54) | 18.00 (16.54, 19.45) | 11.3% | 0% |  | 4.51 (3.73, 5.28) | 2.32 (1.76, 2.88) | 7.9% | 0% |
| Warfarin vs. DOACs and risk of bleeding | Total cohort | 2.51 (-0.08, 5.10) | 4.41 (1.12, 7.69) | 1.6% | 51% |  | -0.09 (-2.61, 2.42) | -0.01 (-1.72, 1.69) | 2.3% | 46% |
| Excluding lower 25% | 2.29 (-0.79, 5.37) | 3.25 (-0.48, 6.99) | 0.8% | 75% |  | -0.55 (-3.38, 2.27) | 0.52 (-1.37, 2.41) | 0.4% | 81% |
| Excluding lower 50% | 0.91 (-3.11, 4.93) | 1.87 (-2.68, 6.42) | 0.8% | 80% |  | -1.47 (-5.23, 2.28) | -0.25 (-2.62, 2.11) | 1.1% | 80% |
| Excluding lower 75% | -1.69 (-7.80, 4.41) | 0.62 (-5.90, 7.14) | 1.8% | 69% |  | -0.69 (-6.07, 4.68) | -3.10 (-7.80, 1.60) | 2.8% | 66% |
| All OAC vs. non-OAC and risk of bleeding | Total cohort | 1.67 (0.65, 2.69) | -2.31 (-3.61, -1.00) | 4.0% | 0% |  | 2.40 (1.21, 3.58) | 2.10 (1.10, 3.10) | 0.1% | 78% |
| Excluding lower 25% | 0.71 (-0.44, 1.86) | -3.37 (-4.81, -1.93) | 4.2% | 0% |  | 2.49 (1.13, 3.85) | 1.92 (0.86, 2.99) | 0.1% | 77% |
| Excluding lower 50% | 1.05 (-0.29, 2.38) | -2.41 (-4.02, -0.80) | 3.8% | 0% |  | 2.99 (1.46, 4.51) | 2.54 (1.31, 3.76) | 0.5% | 77% |
| Excluding lower 75% | -0.36 (-2.33, 1.60) | -1.30 (-3.52, 0.91) | 1.0% | 63% |  | 3.97 (1.91, 6.03) | 3.30 (1.50, 5.11) | 1.3% | 66% |
| **NC EHR system** | | | | | | | | | | |
| PPI vs. H2RA and risk of pneumonia | Total cohort | -2.94 (-6.78, 0.89) | -18.47 (-23.19, -13.75) | 11.9% | 0% |  | -1.18 (-4.43, 2.08) | 1.46 (-0.29, 3.20) | 8.4% | 0% |
| Excluding lower 25% | -3.02 (-7.54, 1.50) | -21.07 (-26.46, -15.67) | 13.8% | 0% |  | -1.33 (-4.84, 2.19) | 2.59 (0.54, 4.65) | 10.8% | 0% |
| Excluding lower 50% | -3.04 (-8.84, 2.75) | -12.71 (-19.43, -5.99) | 7.1% | 13% |  | 2.44 (-1.62, 6.51) | 2.79 (-0.01, 5.59) | 5.2% | 34% |
| Excluding lower 75% | -4.30 (-13.01, 4.40) | -18.62 (-28.14, -9.10) | 10.4% | 12% |  | -0.95 (-7.28, 5.37) | 4.01 (-0.24, 8.25) | 11.8% | 12% |
| PPI vs. non-PPI users and risk of pneumonia | Total cohort | 14.66 (12.89, 16.43) | 29.88 (27.23, 32.52) | 17.6% | 0% |  | 6.70 (5.00, 8.41) | 2.15 (0.77, 3.54) | 11.0% | 0% |
| Excluding lower 25% | 14.72 (12.70, 16.73) | 28.36 (25.40, 31.33) | 15.9% | 0% |  | 6.50 (4.44, 8.56) | 2.43 (0.78, 4.08) | 8.8% | 0% |
| Excluding lower 50% | 14.96 (12.31, 17.61) | 23.80 (20.12, 27.47) | 10.1% | 0% |  | 6.42 (3.88, 8.97) | 3.13 (1.11, 5.16) | 6.0% | 17% |
| Excluding lower 75% | 16.05 (12.45, 19.64) | 21.80 (17.04, 26.56) | 6.4% | 18% |  | 6.72 (3.35, 10.09) | 3.62 (0.87, 6.36) | 5.0% | 37% |
| Warfarin vs. DOACs and risk of bleeding | Total cohort | -15.75 (-26.15, -5.35) | -16.31 (-27.34, -5.28) | 0.4% | 94% |  | -10.72 (-19.76, -1.68) | -9.53 (-18.06, -0.99) | 2.8% | 77% |
| Excluding lower 25% | -18.43 (-31.15, -5.70) | -15.89 (-28.93, -2.85) | 1.9% | 82% |  | -16.81 (-30.25, -3.37) | -12.42 (-23.61, -1.23) | 4.8% | 69% |
| Excluding lower 50% | -26.22 (-42.77, -9.68) | -24.84 (-41.54, -8.14) | 1.0% | 92% |  | -55.35 (-93.82, -16.87) | -21.53 (-37.58, -5.47) | 1.3% | 92% |
| Excluding lower 75% | -29.11 (-51.82, -6.39) | -27.93 (-50.70, -5.16) | 0.9% | 95% |  | -11.44 (-32.36, 9.47) | -19.47 (-38.97, 0.03) | 3.8% | 86% |
| All OAC vs. non-OAC and risk of bleeding | Total cohort | 8.20 (4.10, 12.30) | -0.76 (-5.44, 3.93) | 7.1% | 0% |  | 3.01 (-0.88, 6.90) | 6.42 (2.69, 10.14) | 8.1% | 7% |
| Excluding lower 25% | 6.39 (1.97, 10.82) | -4.31 (-9.32, 0.70) | 9.1% | 0% |  | 0.96 (-3.26, 5.18) | 6.98 (2.77, 11.19) | 10.8% | 1% |
| Excluding lower 50% | 5.93 (0.87, 10.99) | -5.50 (-11.20, 0.20) | 10.5% | 0% |  | 0.67 (-3.71, 5.05) | 9.35 (4.26, 14.43) | 8.3% | 23% |
| Excluding lower 75% | 4.78 (-2.09, 11.65) | -4.03 (-11.53, 3.47) | 8.6% | 24% |  | 3.58 (-2.49, 9.65) | 9.25 (2.98, 15.51) | 12.9% | 19% |

Abbreviations: CI = confidence interval; DOAC = direct-acting oral anticoagulant; EHR = electronic health records; H2RA = H2 receptor antagonists; OAC = oral anticoagulant; PPI = proton pump inhibitors.

*Weighted by inverse probability of treatment.

**Table S12. Metrics for crude and adjusted hazard ratio by level of EHR-continuity: inverse probability weighting analysis**

| **Medication/**  **outcome** | **Level of**  **EHR-continuity** | **Crude** | | | |  | **Weighted*** | | | |
| --- | --- | --- | --- | --- | --- | --- | --- | --- | --- | --- |
| **HREHR**  **(95% CI)** | **HREHR+claims**  **(95% CI)** | **Bias** | **95% CI**  **overlap** |  | **HREHR**  **(95% CI)** | **HREHR+claims**  **(95% CI)** | **Bias** | **95% CI overlap** |
| **MA EHR system** | | | | | | | | | | |
| PPI vs. H2RA and risk of pneumonia | Total cohort | 0.97 (0.92, 1.01) | 0.85 (0.79, 0.92) | 13.73% | 0% |  | 1.01 (0.96, 1.05) | 1.04 (0.97, 1.13) | 3.36% | 58% |
| Excluding lower 25% | 0.93 (0.89, 0.98) | 0.87 (0.81, 0.94) | 6.86% | 30% |  | 1.00 (0.95, 1.05) | 1.02 (0.94, 1.11) | 2.12% | 61% |
| Excluding lower 50% | 0.96 (0.91, 1.02) | 0.92 (0.84, 1.01) | 4.10% | 56% |  | 1.04 (0.98, 1.10) | 1.06 (0.97, 1.16) | 1.86% | 68% |
| Excluding lower 75% | 0.98 (0.90, 1.06) | 0.98 (0.87, 1.10) | 0.02% | 75% |  | 1.05 (0.96, 1.14) | 1.07 (0.95, 1.20) | 1.99% | 69% |
| PPI vs. non-PPI users and risk of pneumonia | Total cohort | 2.40 (2.30, 2.50) | 2.85 (2.64, 3.08) | 18.82% | 0% |  | 1.44 (1.37, 1.50) | 1.59 (1.44, 1.76) | 10.40% | 23% |
| Excluding lower 25% | 2.44 (2.33, 2.55) | 2.82 (2.60, 3.06) | 15.70% | 0% |  | 1.44 (1.36, 1.51) | 1.57 (1.42, 1.75) | 9.16% | 54% |
| Excluding lower 50% | 2.44 (2.30, 2.58) | 2.55 (2.33, 2.78) | 4.31% | 53% |  | 1.46 (1.37, 1.56) | 1.48 (1.33, 1.65) | 1.52% | 44% |
| Excluding lower 75% | 2.48 (2.27, 2.71) | 2.34 (2.08, 2.62) | 6.16% | 56% |  | 1.48 (1.34, 1.63) | 1.46 (1.28, 1.67) | 1.16% | 37% |
| Warfarin vs. DOACs and risk of bleeding | Total cohort | 1.23 (1.00, 1.51) | 1.23 (0.94, 1.60) | 0.37% | 77% |  | 1.01 (0.80, 1.27) | 1.02 (0.76, 1.37) | 0.83% | 71% |
| Excluding lower 25% | 1.17 (0.93, 1.47) | 1.19 (0.89, 1.59) | 1.49% | 77% |  | 0.98 (0.75, 1.27) | 1.08 (0.79, 1.50) | 10.69% | 83% |
| Excluding lower 50% | 1.09 (0.83, 1.43) | 1.06 (0.77, 1.45) | 2.99% | 89% |  | 0.91 (0.65, 1.30) | 0.99 (0.71, 1.38) | 8.61% | 81% |
| Excluding lower 75% | 1.02 (0.71, 1.48) | 0.90 (0.60, 1.35) | 13.10% | 73% |  | 0.97 (0.57, 1.64) | 0.78 (0.47, 1.28) | 24.36% | 69% |
| All OAC vs. non-OAC and risk of bleeding | Total cohort | 0.97 (0.89, 1.06) | 1.26 (1.12, 1.41) | 29.91% | 0% |  | 1.14 (1.05, 1.23) | 1.39 (1.23, 1.56) | 21.54% | 35% |
| Excluding lower 25% | 0.94 (0.86, 1.03) | 1.14 (1.01, 1.29) | 21.60% | 3% |  | 1.12 (1.03, 1.22) | 1.26 (1.12, 1.42) | 12.40% | 50% |
| Excluding lower 50% | 1.00 (0.90, 1.12) | 1.27 (1.11, 1.46) | 27.19% | 2% |  | 1.16 (1.05, 1.29) | 1.44 (1.25, 1.65) | 24.04% | 23% |
| Excluding lower 75% | 1.09 (0.93, 1.28) | 1.15 (0.95, 1.38) | 5.38% | 73% |  | 1.27 (1.09, 1.49) | 1.40 (1.16, 1.69) | 10.08% | 63% |
| **NC EHR system** | | | | | | | | | | |
| PPI vs. H2RA and risk of pneumonia | Total cohort | 0.74 (0.66, 0.83) | 0.87 (0.72, 1.05) | 17.28% | 29% |  | 0.96 (0.85, 1.09) | 1.14 (0.93, 1.40) | 18.64% | 23% |
| Excluding lower 25% | 0.69 (0.60, 0.79) | 0.88 (0.71, 1.08) | 26.95% | 16% |  | 0.95 (0.83, 1.10) | 1.23 (0.98, 1.55) | 29.79% | 9% |
| Excluding lower 50% | 0.79 (0.66, 0.93) | 0.89 (0.71, 1.13) | 12.83% | 50% |  | 1.08 (0.91, 1.30) | 1.20 (0.93, 1.55) | 11.28% | 39% |
| Excluding lower 75% | 0.72 (0.57, 0.91) | 0.87 (0.63, 1.19) | 20.71% | 45% |  | 0.97 (0.75, 1.26) | 1.26 (0.90, 1.77) | 30.02% | 25% |
| PPI vs. non-PPI users and risk of pneumonia | Total cohort | 2.56 (2.29, 2.86) | 4.93 (3.94, 6.17) | 92.59% | 0% |  | 1.41 (1.24, 1.61) | 1.37 (1.00, 1.88) | 2.95% | 41% |
| Excluding lower 25% | 2.45 (2.16, 2.79) | 4.23 (3.31, 5.40) | 72.54% | 0% |  | 1.38 (1.18, 1.60) | 1.35 (0.98, 1.88) | 1.92% | 44% |
| Excluding lower 50% | 2.19 (1.85, 2.58) | 3.32 (2.53, 4.36) | 51.50% | 2% |  | 1.38 (1.14, 1.66) | 1.39 (0.99, 1.94) | 0.59% | 41% |
| Excluding lower 75% | 2.03 (1.65, 2.50) | 3.01 (2.19, 4.13) | 48.05% | 12% |  | 1.37 (1.08, 1.75) | 1.37 (0.94, 1.99) | 0.20% | 55% |
| Warfarin vs. DOACs and risk of bleeding | Total cohort | 0.62 (0.42, 0.92) | 0.55 (0.35, 0.85) | 12.81% | 78% |  | 0.64 (0.41, 0.99) | 0.58 (0.34, 1.00) | 10.71% | 85% |
| Excluding lower 25% | 0.62 (0.39, 0.99) | 0.53 (0.32, 0.86) | 17.66% | 71% |  | 0.53 (0.31, 0.91) | 0.53 (0.29, 0.97) | 0.34% | 58% |
| Excluding lower 50% | 0.50 (0.29, 0.88) | 0.45 (0.25, 0.80) | 11.03% | 82% |  | 0.27 (0.13, 0.53) | 0.42 (0.22, 0.79) | 54.37% | 77% |
| Excluding lower 75% | 0.50 (0.24, 1.04) | 0.48 (0.23, 1.00) | 5.26% | 93% |  | 0.64 (0.27, 1.54) | 0.48 (0.22, 1.03) | 34.26% | 91% |
| All OAC vs. non-OAC and risk of bleeding | Total cohort | 1.02 (0.84, 1.25) | 1.69 (1.33, 2.16) | 66.07% | 0% |  | 1.09 (0.89, 1.33) | 1.45 (1.13, 1.88) | 33.27% | 7% |
| Excluding lower 25% | 0.92 (0.75, 1.14) | 1.54 (1.19, 1.97) | 66.94% | 0% |  | 1.03 (0.84, 1.26) | 1.42 (1.10, 1.84) | 38.02% | 6% |
| Excluding lower 50% | 0.84 (0.67, 1.06) | 1.45 (1.09, 1.93) | 72.88% | 0% |  | 0.90 (0.71, 1.14) | 1.40 (1.05, 1.86) | 55.64% | 11% |
| Excluding lower 75% | 1.11 (0.79, 1.56) | 1.82 (1.19, 2.80) | 64.31% | 19% |  | 1.04 (0.73, 1.48) | 1.62 (1.06, 2.49) | 56.04% | 18% |

Abbreviations: CI = confidence interval; DOAC = direct-acting oral anticoagulant; EHR = electronic health records; H2RA = H2 receptor antagonists; OAC = oral anticoagulant; PPI = proton pump inhibitors.

*Weighted by inverse probability of treatment.

**Table S13. MSE for crude and adjusted IRD and HR**

|  | Medication/outcome | Level of  EHR-continuity | MSE | | | |
| --- | --- | --- | --- | --- | --- | --- |
|  |  |  | Crude IRD | Adjusted IRD | Crude HR | Adjusted HR |
| MA system | PPI vs. H2RA and risk of pneumonia | Total cohort | 5% | 0% | 21% | 4% |
| Excluding lower 25% | 6% | 0% | 20% | 4% |
| Excluding lower 50% | 6% | 0% | 21% | 4% |
| Excluding lower 75% | 8% | 1% | 24% | 6% |
| PPI vs. non-PPI users and risk of pneumonia | Total cohort | 4% | 0% | 23% | 4% |
| Excluding lower 25% | 5% | 0% | 22% | 4% |
| Excluding lower 50% | 5% | 0% | 21% | 4% |
| Excluding lower 75% | 6% | 0% | 25% | 6% |
| Warfarin vs. DOACs and risk of bleeding | Total cohort | 9% | 1% | 36% | 13% |
| Excluding lower 25% | 10% | 1% | 38% | 14% |
| Excluding lower 50% | 11% | 1% | 40% | 15% |
| Excluding lower 75% | 14% | 2% | 47% | 20% |
| All OAC vs. non-OAC and risk of bleeding | Total cohort | 6% | 0% | 31% | 6% |
| Excluding lower 25% | 6% | 0% | 29% | 6% |
| Excluding lower 50% | 6% | 0% | 32% | 7% |
| Excluding lower 75% | 8% | 1% | 31% | 9% |
|  |  |  |  |  |  |
| NC system | PPI vs. H2RA and risk of pneumonia | Total cohort | 12% | 1% | 33% | 9% |
| Excluding lower 25% | 13% | 1% | 38% | 10% |
| Excluding lower 50% | 14% | 2% | 35% | 11% |
| Excluding lower 75% | 18% | 3% | 42% | 15% |
| PPI vs. non-PPI users and risk of pneumonia | Total cohort | 8% | 1% | 73% | 11% |
| Excluding lower 25% | 9% | 1% | 60% | 12% |
| Excluding lower 50% | 10% | 1% | 51% | 13% |
| Excluding lower 75% | 11% | 1% | 53% | 16% |
| Warfarin vs. DOACs and risk of bleeding | Total cohort | 20% | 4% | 48% | 22% |
| Excluding lower 25% | 22% | 5% | 51% | 24% |
| Excluding lower 50% | 27% | 6% | 54% | 28% |
| Excluding lower 75% | 32% | 9% | 61% | 37% |
| All OAC vs. non-OAC and risk of bleeding | Total cohort | 14% | 1% | 52% | 12% |
| Excluding lower 25% | 14% | 1% | 53% | 12% |
| Excluding lower 50% | 18% | 2% | 60% | 14% |
| Excluding lower 75% | 20% | 2% | 56% | 19% |

Abbreviations: CI = confidence interval; DOAC = direct-acting oral anticoagulant; EHR = electronic health records; H2RA = H2 receptor antagonists; HR = hazard ratio; IRD = incidence rate difference; MSE = mean squared error; OAC = oral anticoagulant; PPI = proton pump inhibitors.

**Figure S1. Study design for the empirical example study of users vs. non-users of oral anticoagulants and risk of bleeding among atrial fibrillation patients.**

**Figure legend:**

Abbreviations: AF = atrial fibrillation, OAC = oral anticoagulant.

**
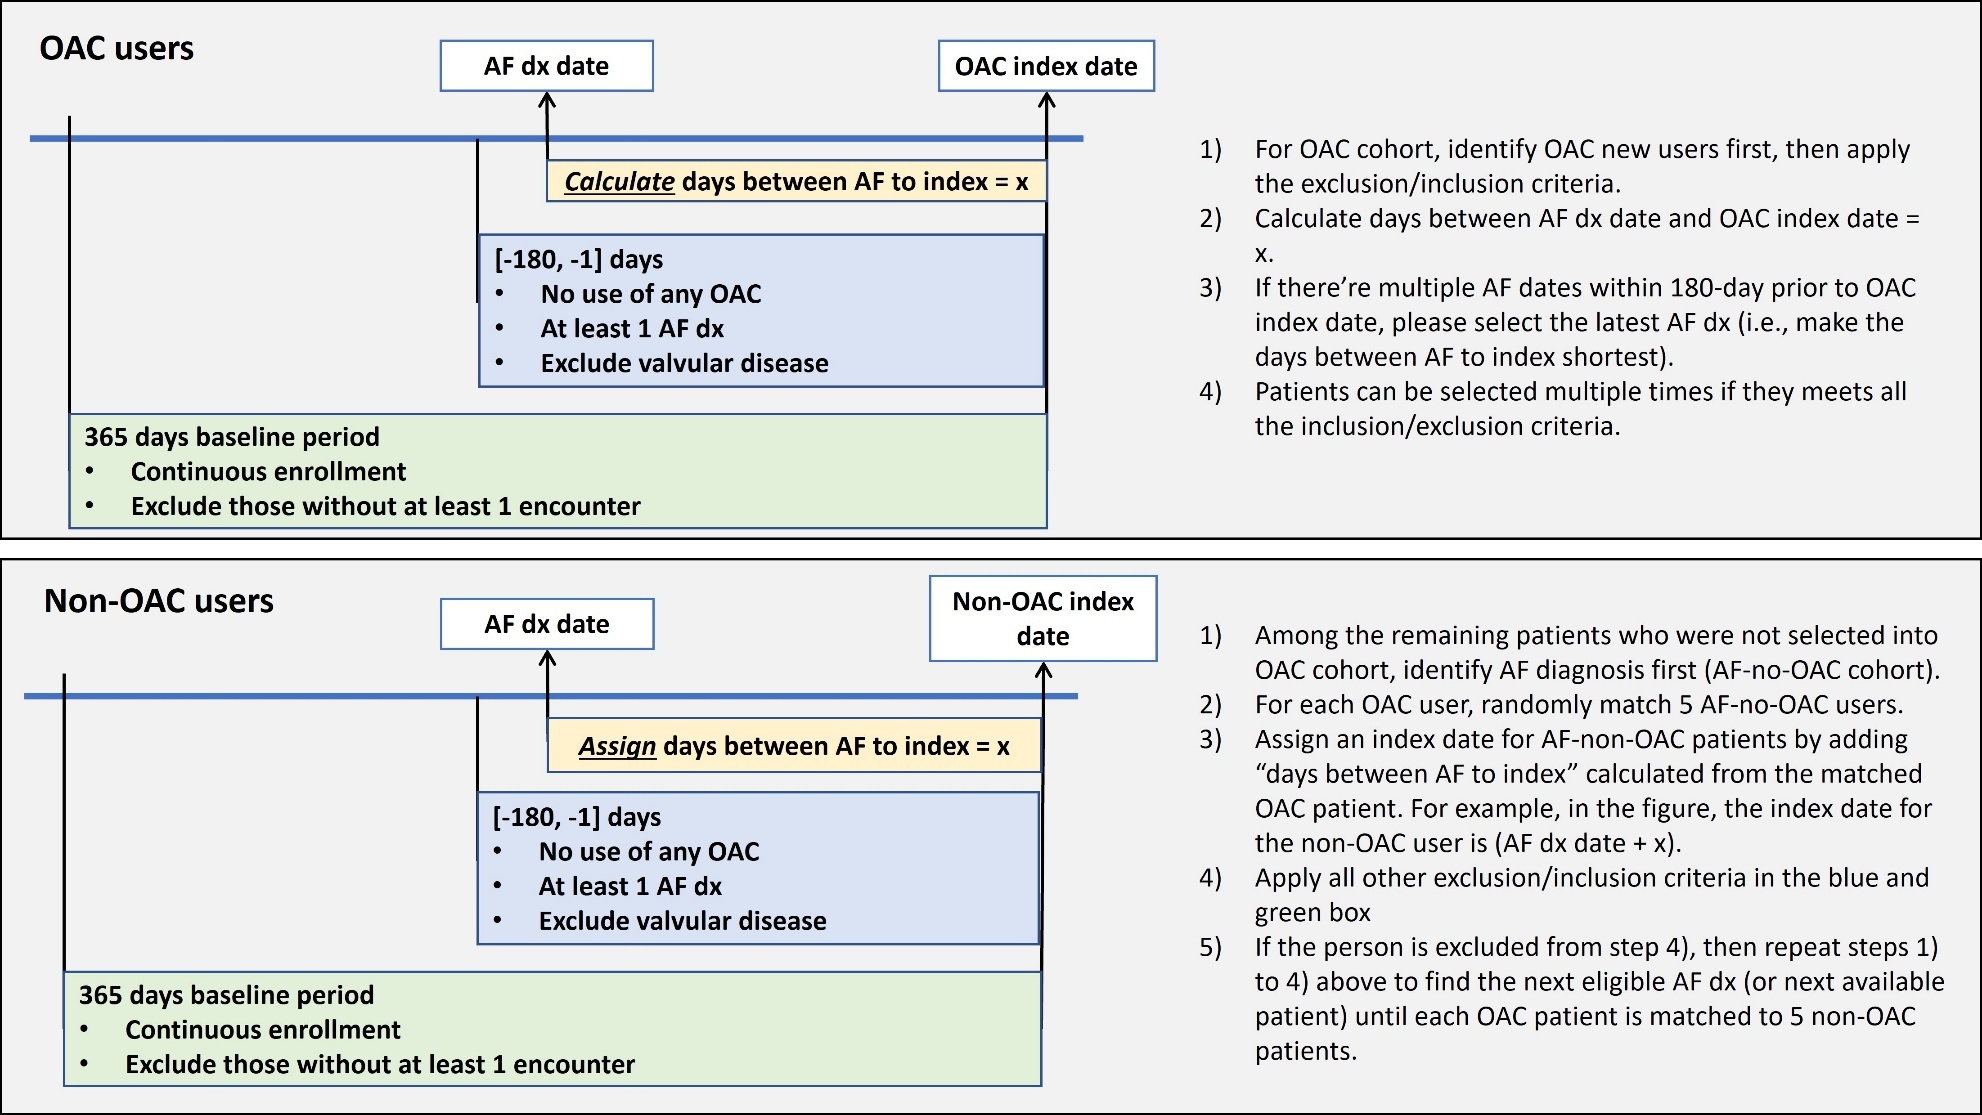
**

**Figure S2. Depiction of incidence rate difference 95% confidence interval overlap, MA system**

**Figure legend:**

Abbreviations: CI = confidence interval; DOAC = direct-acting oral anticoagulant; EHR = electronic health records; H2RA = H2 receptor antagonists; IRD = incidence rate difference; OAC = oral anticoagulant; PPI = proton pump inhibitors.

*Adjusted by propensity score decile.

**
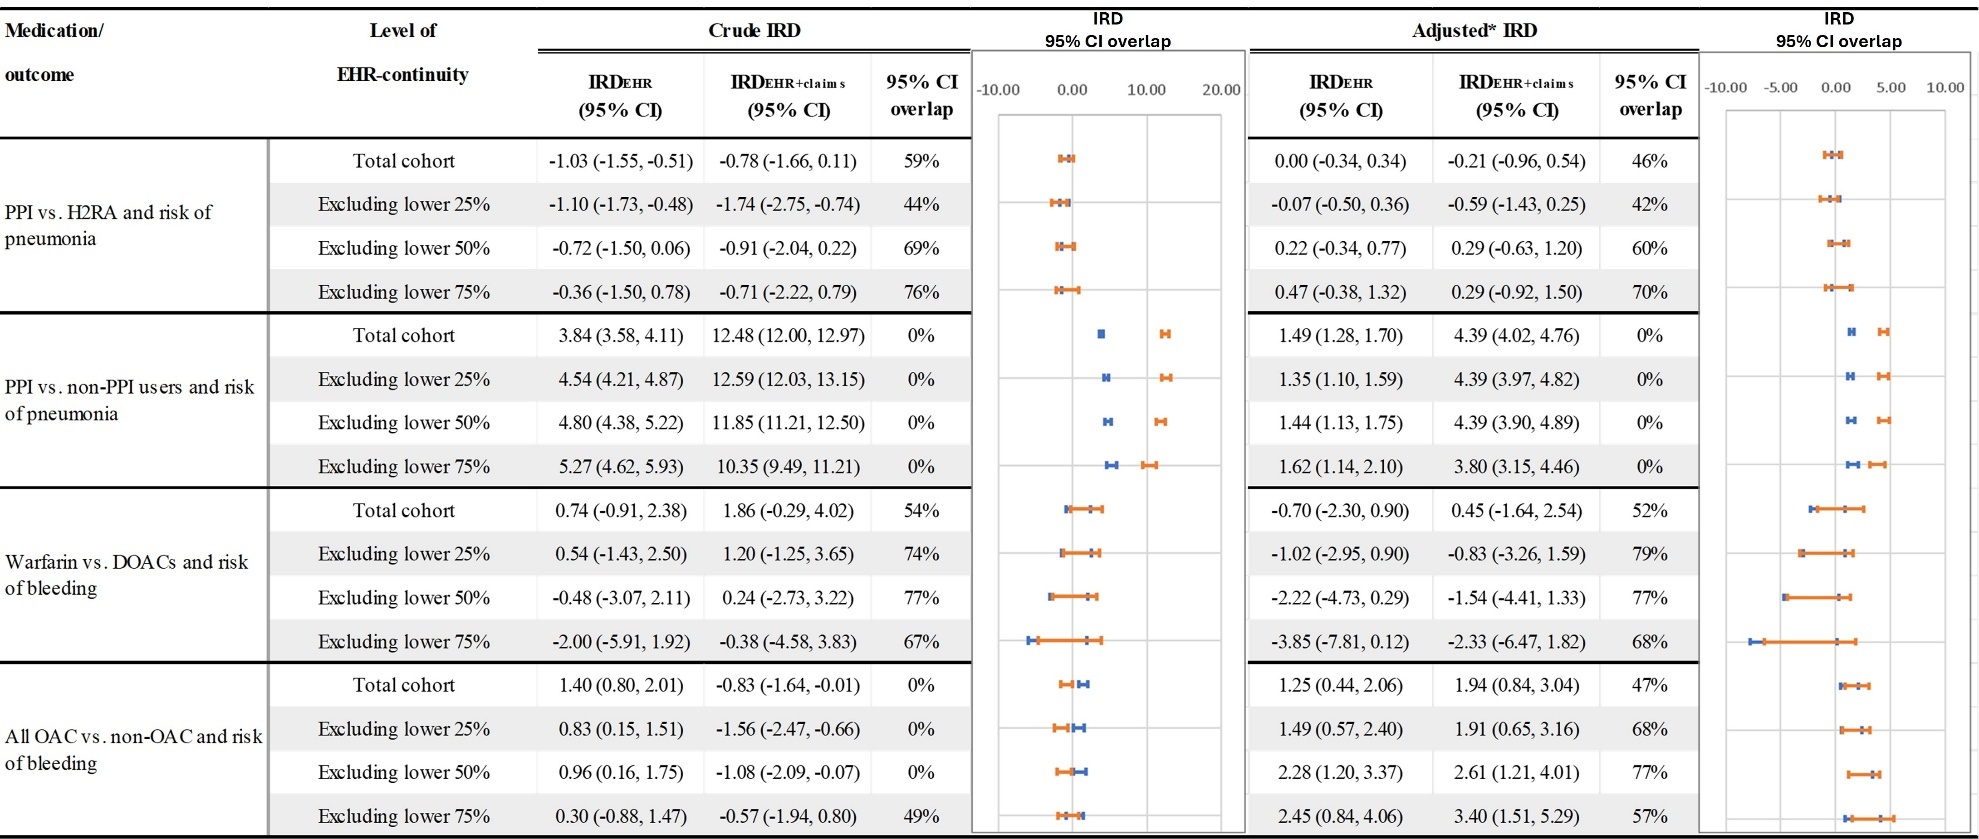
**

**Figure S3. Depiction of hazard ratio 95% confidence interval overlap, MA system**

**Figure legend:**

Abbreviations: CI = confidence interval; DOAC = direct-acting oral anticoagulant; EHR = electronic health records; H2RA = H2 receptor antagonists; IRD = incidence rate difference; OAC = oral anticoagulant; PPI = proton pump inhibitors.

*Adjusted by propensity score decile.

**
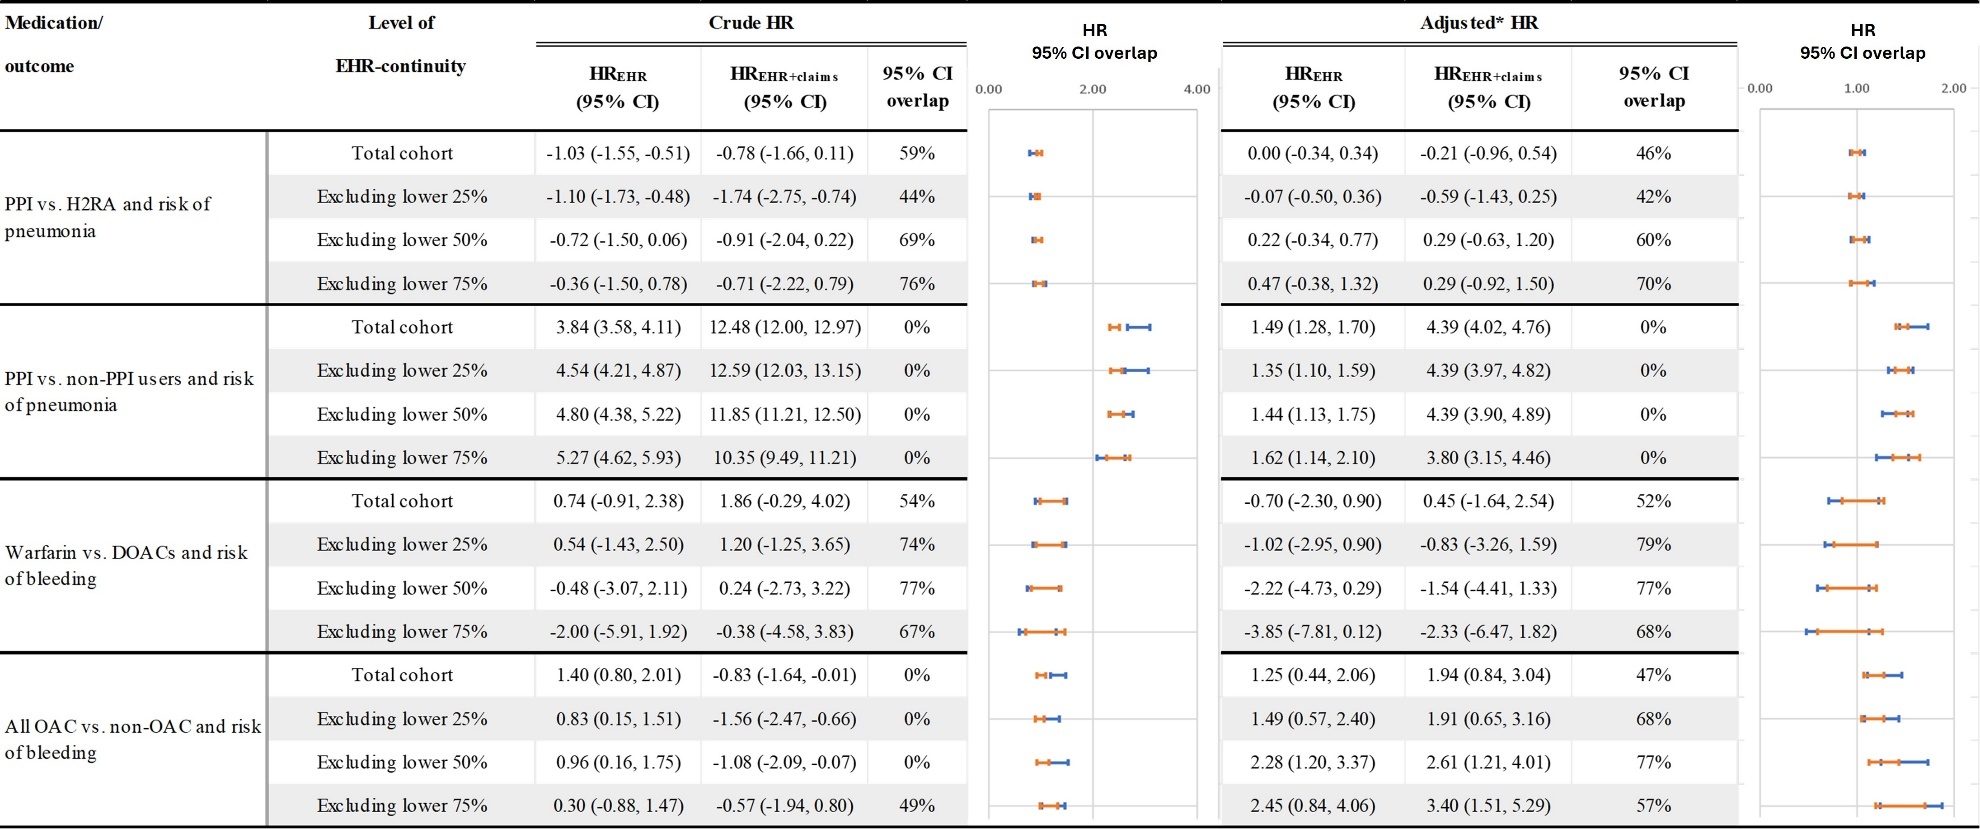
**

**Figure S4. Kaplan-Meier plots for study outcomes among total cohort, MA system EHR+claims data**

**Figure legend:**

A. PPI vs. H2RA and pneumonia; B. PPI vs. non-PPI and risk of pneumonia; C. Warfarin vs. DOACs and risk of bleeding; D. All OAC vs. non-OAC and risk of bleeding. Abbreviations: CI = confidence interval; DOAC = direct-acting oral anticoagulant; EHR = electronic health records; H2RA = H2 receptor antagonists; IRD = incidence rate difference; OAC = oral anticoagulant; PPI = proton pump inhibitors.

**
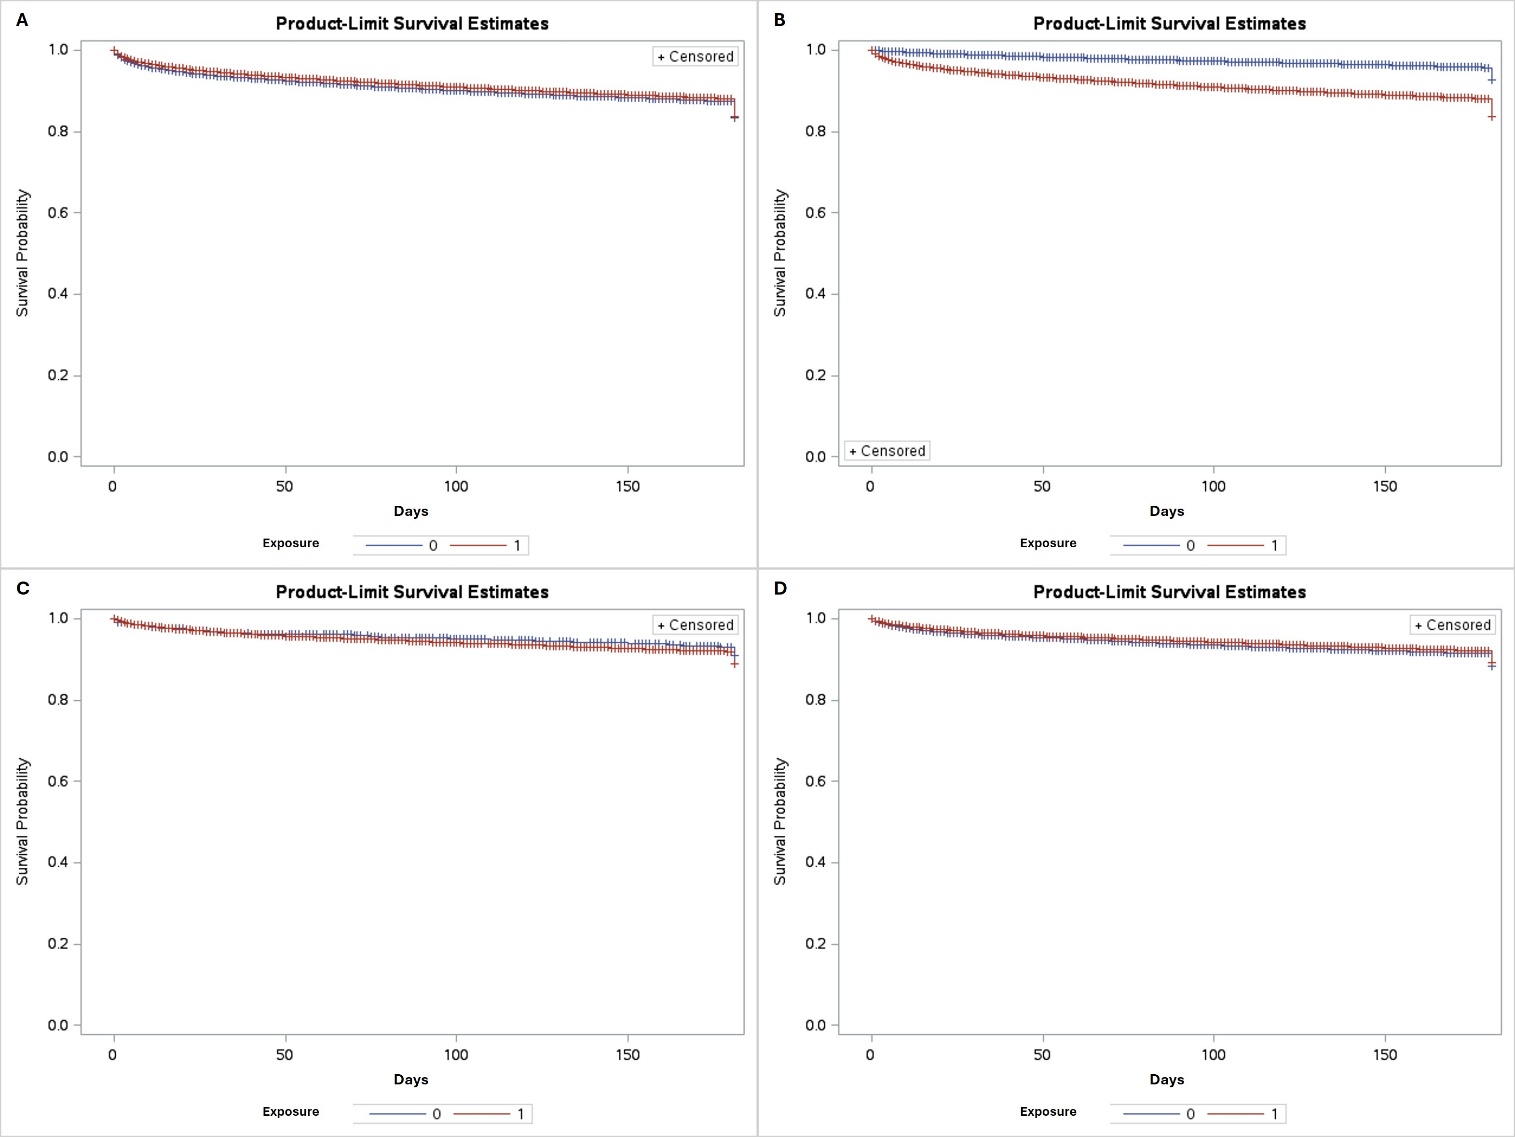
**

**Figure S5. Kaplan-Meier plots for study outcomes among total cohort, MA system EHR data only**

**Figure legend:**

A. PPI vs. H2RA and pneumonia; B. PPI vs. non-PPI and risk of pneumonia; C. Warfarin vs. DOACs and risk of bleeding; D. All OAC vs. non-OAC and risk of bleeding. Abbreviations: CI = confidence interval; DOAC = direct-acting oral anticoagulant; EHR = electronic health records; H2RA = H2 receptor antagonists; IRD = incidence rate difference; OAC = oral anticoagulant; PPI = proton pump inhibitors.

**
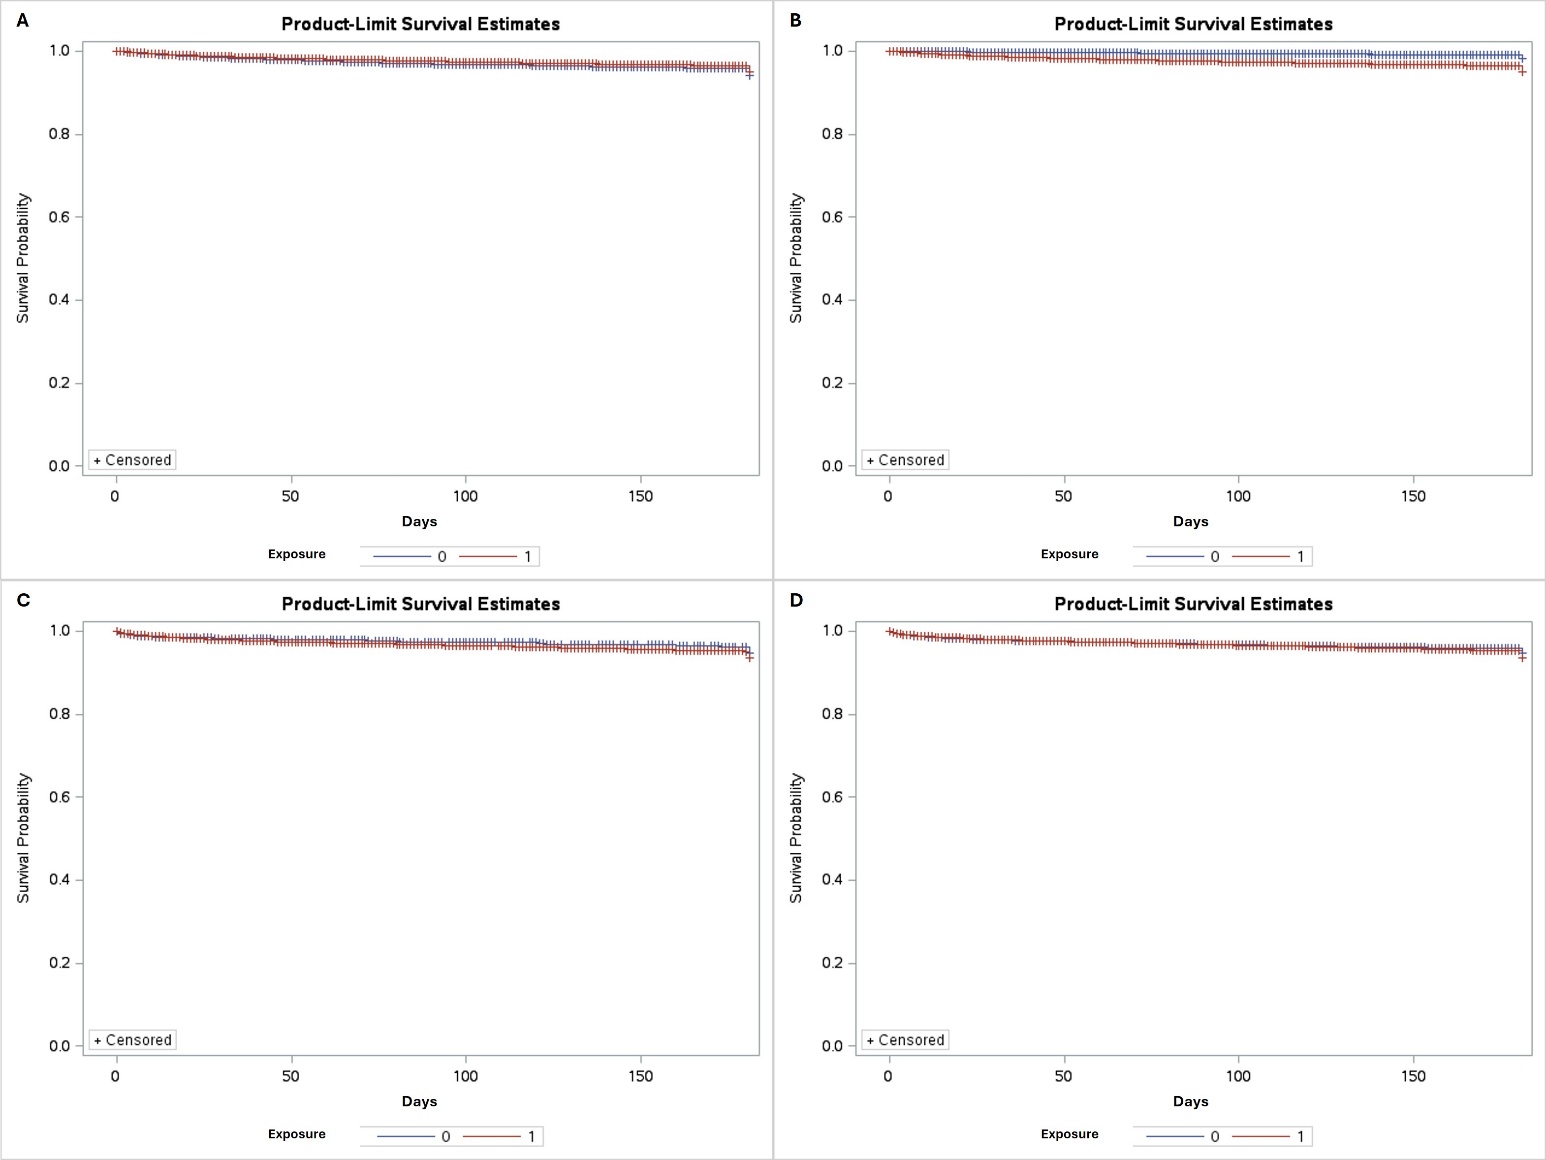
**

**Figure S6. Kaplan-Meier plots for study outcomes among total cohort, NC system EHR+claims data**

**Figure legend:**

A. PPI vs. H2RA and pneumonia; B. PPI vs. non-PPI and risk of pneumonia; C. Warfarin vs. DOACs and risk of bleeding; D. All OAC vs. non-OAC and risk of bleeding. Abbreviations: CI = confidence interval; DOAC = direct-acting oral anticoagulant; EHR = electronic health records; H2RA = H2 receptor antagonists; IRD = incidence rate difference; OAC = oral anticoagulant; PPI = proton pump inhibitors.

**
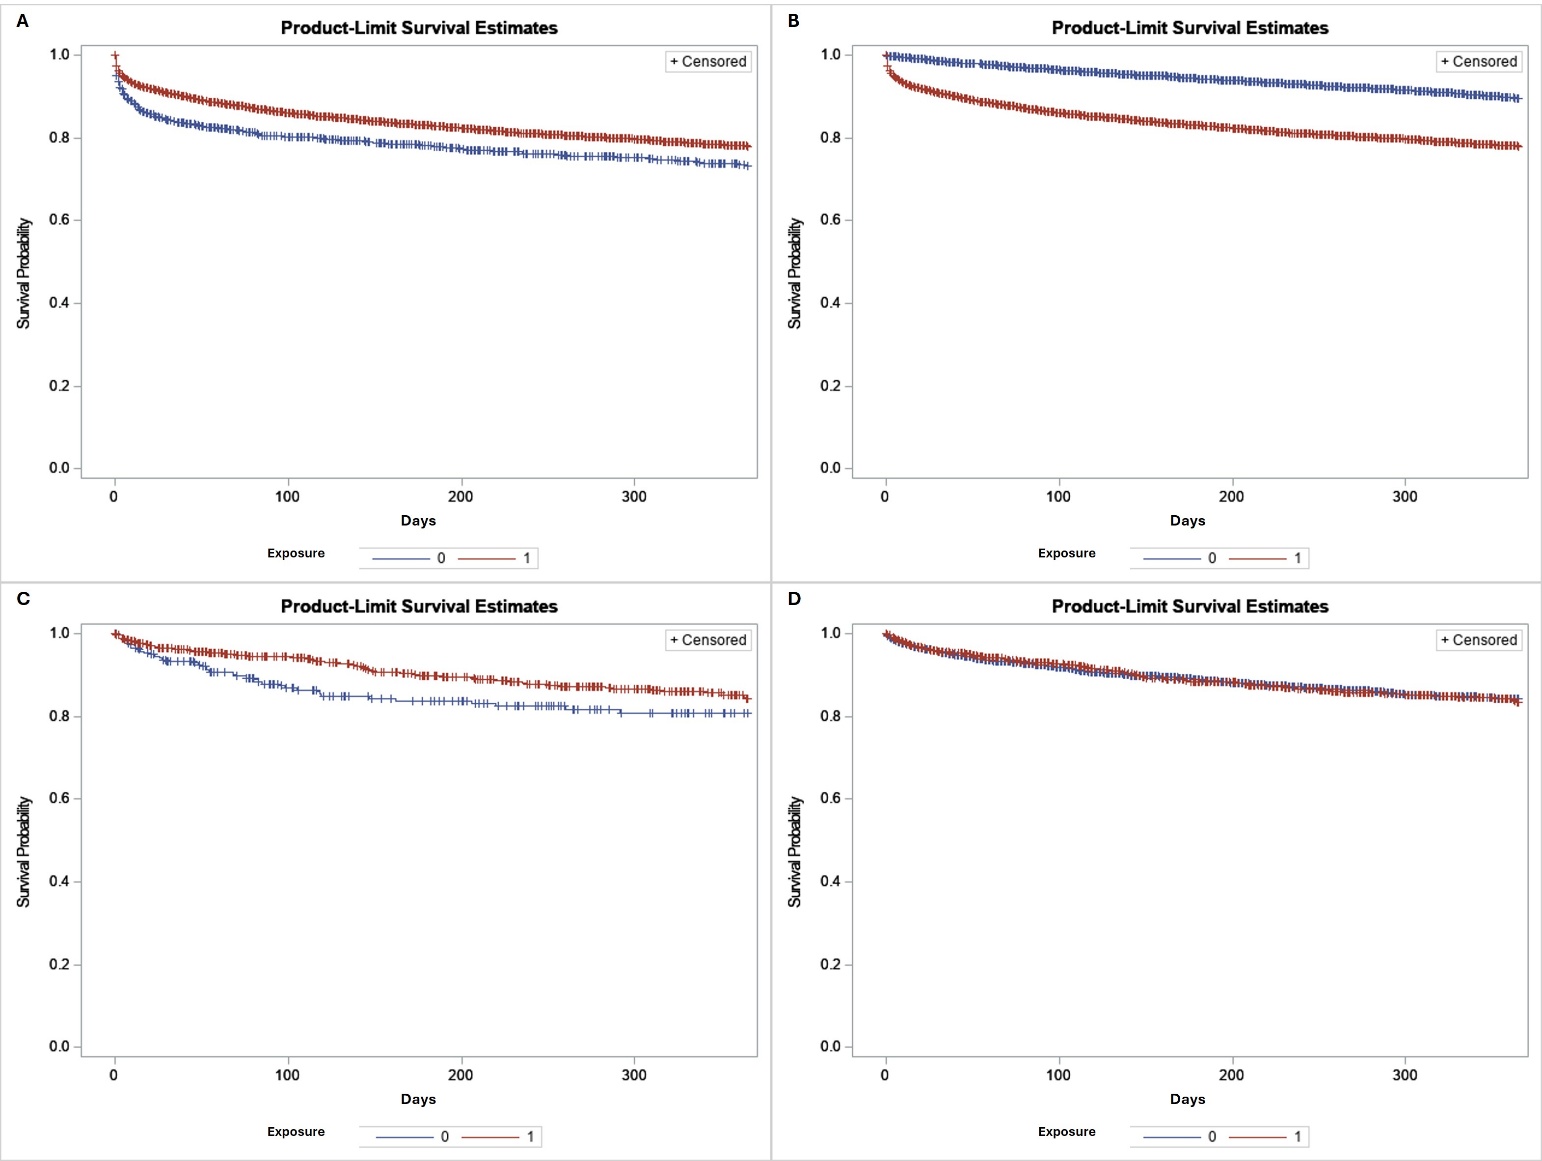
**

**Figure S7. Kaplan-Meier plots for study outcomes among total cohort, NC system EHR data only**

**Figure legend:**

A. PPI vs. H2RA and pneumonia; B. PPI vs. non-PPI and risk of pneumonia; C. Warfarin vs. DOACs and risk of bleeding; D. All OAC vs. non-OAC and risk of bleeding. Abbreviations: CI = confidence interval; DOAC = direct-acting oral anticoagulant; EHR = electronic health records; H2RA = H2 receptor antagonists; IRD = incidence rate difference; OAC = oral anticoagulant; PPI = proton pump inhibitors.

**
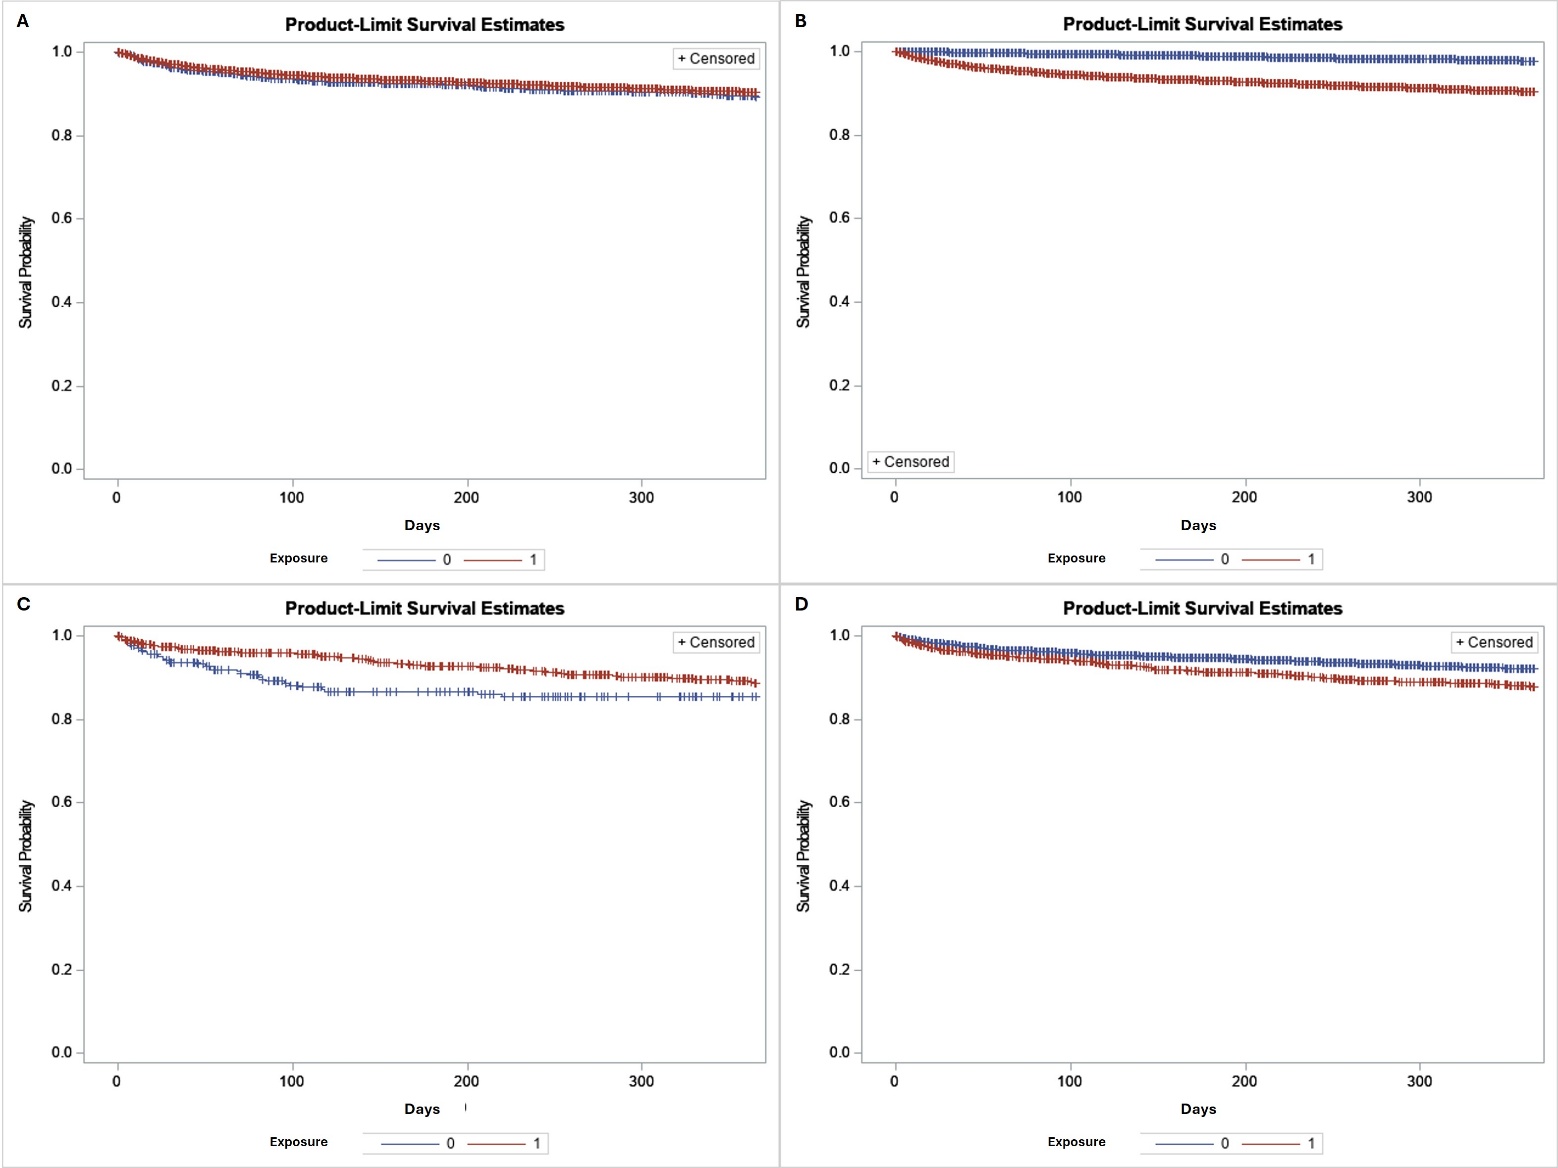
**

**Figure S8. Plotted MSE for crude and adjusted IRD and HR across study examples and EHR systems, by EHR-continuity levels**

**Figure legend:**

Abbreviations: CI = confidence interval; DOAC = direct-acting oral anticoagulant; EHR = electronic health records; H2RA = H2 receptor antagonists; HR = hazard ratio; IRD = incidence rate difference; OAC = oral anticoagulant; PPI = proton pump inhibitors.

**
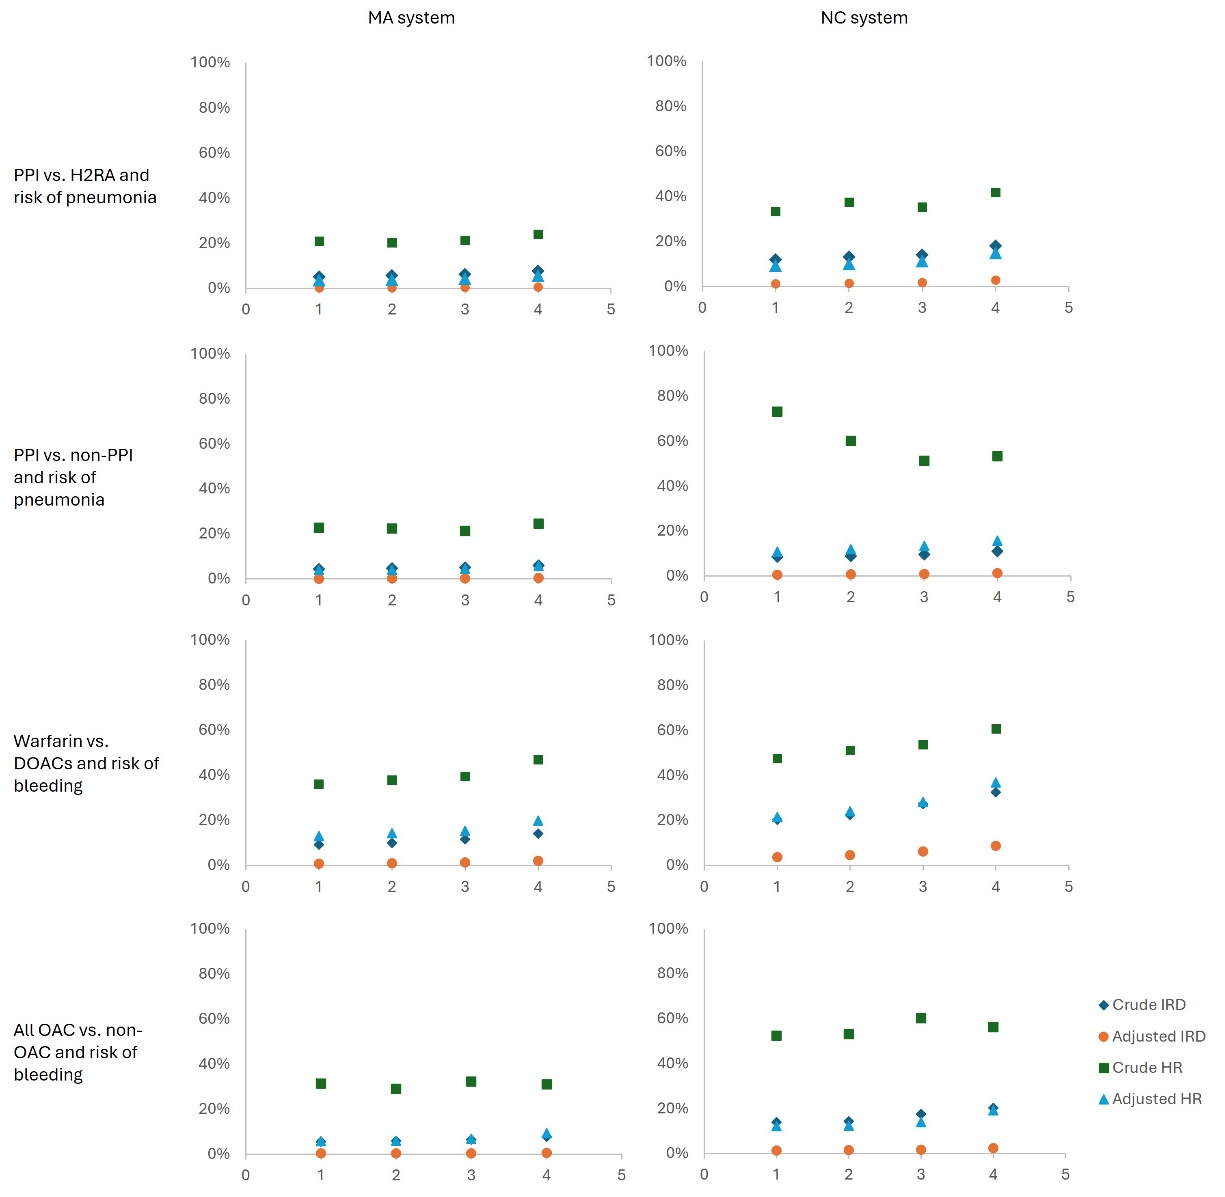
**
